# 1 SSU72 phosphatase is a telomere replication terminator

2 Jose Miguel Escandell<sup>1,2,6</sup>, Edison S. Mascarenhas Carvalho<sup>1,2</sup>, Maria Gallo-  
3 Fernandez<sup>2</sup>, Clara C. Reis<sup>2</sup>, Samah Matmati<sup>3</sup>, Inês Matias Luís<sup>4</sup>, Isabel A. Abreu<sup>4</sup>,  
4 Stéphane Coulon<sup>3</sup> and Miguel Godinho Ferreira<sup>2,5,6</sup>

5 <sup>1</sup> These authors contribute equally in this work

6 <sup>2</sup> Instituto Gulbenkian de Ciência, Oeiras, Portugal.

7 <sup>3</sup> CRCM, CNRS, Inserm, Aix-Marseille Univ., Institut Paoli-Calmettes, 27 bd Lei Roure, Marseille, France. Equipe  
8 labellisée Ligue.

9 <sup>4</sup> Instituto de Tecnologia Química e Biológica António Xavier, Universidade Nova de Lisboa, Oeiras, Portugal

10 <sup>5</sup> Institute for Research on Cancer and Aging of Nice (IRCAN), INSERM U1081 UMR7284 CNRS, 06107 Nice,  
11 France.

12 <sup>6</sup>Corresponding authors

13 Requests for materials should be addressed to M.G.F. (mgferreira@igc.gulbenkian.pt)

14 **Abstract**

15 Telomeres, the protective ends of eukaryotic chromosomes, are replicated through  
16 concerted actions by conventional DNA polymerases and telomerase, though the  
17 regulation of this process is not fully understood. Telomere replication requires (C)-  
18 Stn1-Ten1, a telomere ssDNA-binding complex that is homologous to RPA. Here, we  
19 show that the evolutionarily conserved phosphatase Ssu72 is responsible for  
20 terminating the cycle of telomere replication in fission yeast. Ssu72 controls the  
21 recruitment of Stn1 to telomeres by regulating Stn1 phosphorylation at S74, a  
22 residue that lies within the conserved OB fold domain. Consequently, *ssu72* $\Delta$   
23 mutants are defective in telomere replication and exhibit long 3' overhangs, which  
24 are indicative of defective lagging strand DNA synthesis. We also show that hSSU72  
25 regulates telomerase activation in human cells by controlling the recruitment of  
26 hSTN1 to telomeres. Thus, in this study, we demonstrate a previously unknown yet  
27 conserved role for the phosphatase SSU72, whereby this enzyme controls telomere  
28 homeostasis by activating lagging strand DNA synthesis, thus terminating the cycle  
29 of telomere replication.

30 **Keywords:** Fission yeast; Telomere; CST; SSU72; lagging strand synthesis

## 31 **Introduction**

32           Telomeres are protein-DNA complexes that form the ends of eukaryotic  
33 chromosomes (reviewed in <sup>1</sup>). Telomeres predominantly function to prevent the loss  
34 of genetic information and to inhibit DNA repair at the chromosome termini, thus  
35 maintaining telomere protection and genome stability. Loss of telomere regulation  
36 has been linked to two main hallmarks of cancer: replicative immortality and genome  
37 instability <sup>2</sup>. Telomeres face an additional challenge: DNA replication. Due to G-rich  
38 repetitive DNA sequence and protective structures, telomeres represent a natural  
39 obstacle for passing replication forks <sup>3</sup>. Replication fork collapse can lead to the loss  
40 of whole telomere tracts. To counteract these effects, telomerase (Trt1 in *S. pombe*  
41 and TERT in mammals) is responsible for adding specific repetitive sequences to  
42 telomeres, compensating for the cell's inability to replicate chromosome ends <sup>4</sup>.  
43 However, it is currently not understood how telomerase activity is regulated and how  
44 the telomerase cycle is coupled to telomeric DNA replication. Intriguingly, several  
45 DNA replication proteins are required for proper telomere elongation <sup>5</sup>. Conversely,  
46 specific telomere components are themselves required for proper telomere  
47 replication and telomere length regulation <sup>6,7</sup>, suggesting that there is a very thin line  
48 separating telomere replication and telomerase activity.

49           Using fission yeast, Chang et al. proposed a dynamic model that  
50 demonstrates how telomere replication controls telomere length and how this is  
51 carried out by the telomere complex (Chang et al., 2013). The telomere double  
52 strand components Taz1, Rap1, and Poz1 promote the recruitment of Pol $\alpha$ -Primase  
53 to telomeres. Because shorter telomeres possess less Taz1/Rap1/Poz1, Pol $\alpha$ -  
54 Primase recruitment, and therefore lagging-strand synthesis, is delayed at

55 chromosome ends, leading to the accumulation of ssDNA at telomeres. This event  
56 results in the activation of the major checkpoint protein kinase Rad3<sup>ATR</sup> and the  
57 subsequent phosphorylation of telomeric Ccq1-T93, a step required for telomerase  
58 activation. Thus, as a consequence of delayed Pol $\alpha$ -Primase recruitment to short  
59 telomeres and the subsequent accumulation of ssDNA, Rad3<sup>ATR</sup> is transiently  
60 activated leading to telomerase recruitment and telomere elongation.

61 Another complex known as CST (Cdc13/Stn1/Ten1 in *S. cerevisiae* and  
62 CTC1/STN1/TEN1 in mammals), is known to control telomere replication. This  
63 complex is responsible for both protection from 5' strand nucleolytic degradation and  
64 recruitment of the Pol $\alpha$ -primase complex to telomeres, thus promoting telomere  
65 lagging-strand DNA synthesis (Grossi et al., 2004; Lin and Zakian, 1996). Notably,  
66 CST is not only required to recruit Pol $\alpha$ -primase but is also responsible for the switch  
67 from primase to polymerase activity, which is required for gap-less DNA replication  
68 <sup>11</sup>. In humans, in addition to its role in telomere replication <sup>12</sup>, the CST complex also  
69 functions as a telomerase activity terminator <sup>13</sup> by inhibiting telomerase activity  
70 through primer confiscation and direct interaction with the POT1-TPP1 dimer.  
71 However, the mechanism regulating these CST functions remains unknown. In  
72 fission yeast, although *stn1*<sup>+</sup> and *ten1*<sup>+</sup> homologs exist, no Cdc13/CTC1 homolog has  
73 been found to date <sup>14</sup>. Recent studies have revealed that Stn1 is required for  
74 telomere and subtelomere replication <sup>15</sup> and <sup>16</sup>, supporting the conserved role of  
75 fission yeast (C)ST in DNA replication.

76 In agreement with the replication model proposed by <sup>17</sup> and reviewed in <sup>18</sup>, the  
77 telomere-binding protein, Rif1 was shown to regulate telomere DNA replication  
78 timing by recruiting Glc7 phosphatase to origins of replication and inhibiting Cdc7

79 activities in budding yeast ( Hiraga et al., 2014; Mattarocci et al., 2014). Notably, this  
80 role is conserved in other organisms such as fission yeast<sup>22</sup> and human cells<sup>23</sup>.  
81 Importantly, *rif1* mutants display long telomeres; this effect is suggested to be a  
82 result of origin firing dysregulation<sup>18</sup>. However, how telomere replication is  
83 terminated and how this is coupled with the regulation of telomere length remains  
84 unknown. Here, we report that the phosphatase family member Ssu72 displays a  
85 conserved role as a telomere replication terminator. Ssu72 was previously identified  
86 as an RNA polymerase II C-terminal domain phosphatase and is highly conserved  
87 from yeast to human<sup>24</sup>. In addition, Ssu72 functions as a cohesin-binding factor  
88 involved in sister-chromatid cohesion by counteracting the phosphorylation of SA2,  
89 another cohesion complex member<sup>25</sup>. In fission yeast, in addition to regulating RNA  
90 polymerase activity, Ssu72 has recently been shown to regulate chromosome  
91 condensation<sup>26</sup>. However, none of the previous studies have noted deregulated  
92 telomere replication. Our data strongly support an unexpected role for Ssu72 in  
93 controlling lagging-strand synthesis through the regulation of Stn1 Serine74  
94 phosphorylation, thus reducing telomeric ssDNA and inhibiting telomerase  
95 recruitment.

96

## 97 **Results**

### 98 **Ssu72 is a negative regulator of telomere elongation**

99 We carried out a genome-wide screen for regulators of telomere homeostasis  
100 in *S. pombe* using a commercially available whole-genome deletion library (*Bioneer*  
101 corporation). This library allowed us to identify new non-essential genes involved in  
102 telomere homeostasis in fission yeast (**Figure 1A**). Of the genes identified from the  
103 screen, we selected the highly conserved phosphatase *ssu72+* (SPAC3G9.04) as  
104 the most promising candidate for further characterization. We generated a deletion  
105 mutant (*ssu72Δ*) as well as a point mutant devoid of phosphatase activity (*ssu72-*  
106 *C13S*) and found that these two mutants possess longer telomeres (**Figure 1B**).  
107 Additionally, we found that Ssu72 localized to telomeres in a cell cycle-dependent  
108 manner. We performed cell cycle synchronization using a *cdc25-22* block-release  
109 method in a *ssu72-myc* tagged strain and measured Ssu72 binding to telomeres by  
110 chromatin immunoprecipitation (ChIP). Cell cycle phases and synchronization  
111 efficiency were measured using the cell septation index. Ssu72-myc is recruited to  
112 telomeres in late S phase and declines later in the cell cycle (**Figure 1C**).  
113 Interestingly, Ssu72 is recruited to telomeres at approximately the same time as the  
114 arrival of the lagging strand machinery at chromosome ends <sup>17</sup>.

115 *ssu72Δ* cells displayed increased (~1 Kb) telomere lengths compared to wild-  
116 type telomeres (~300 bp) (**Figure 1B**). We set out to understand the nature of  
117 telomere elongation in the *ssu72* mutant background. To test if the telomere  
118 elongation was dependent on telomerase, *trt1Δ* (deletion mutant for the catalytic  
119 subunit of telomerase) and *ssu72Δ* double heterozygous diploids were sporulated.  
120 Of the resulting tetrads, *trt1Δ* and *trt1Δ ssu72Δ* double mutants were selected and

121 streaked for several generations in order to facilitate telomere shortening in the  
122 absence of telomerase. While *ssu72* mutant cells displayed long telomeres, *ssu72Δ*  
123 *trt1Δ* double mutant and *trt1Δ* single mutant cells displayed similarly shortened  
124 telomeres (**Figure 1D**). ChIP experiments consistently demonstrated an  
125 accumulation of Trt1-myc at *ssu72Δ* telomeres compared to wt cells (**Figure 1E**).  
126 Thus, the longer telomeres exhibited by *ssu72Δ* mutants were a consequence of  
127 telomerase deregulation.

128 Two independent studies <sup>27,28</sup> showed that Ccq1 phosphorylation at Thr93 is  
129 required for telomerase-mediated telomere elongation in fission yeast. Using  
130 Western blot shift analysis, we observed that Ccq1 was phosphorylated in *ssu72Δ*  
131 cells when we compared to those of WT strains (**Figure 1F**). To further confirm that  
132 telomere elongation was telomerase-dependent, we repeated the previous  
133 experiment using a phosphorylation-resistant mutant version of Ccq1 <sup>27</sup>. We  
134 germinated a double heterozygous *ccq1-T93A/+ ssu72Δ/+* mutant and analyzed its  
135 progeny. As expected, *ccq1-T93A ssu72Δ* double mutants displayed a similar  
136 telomere-shortening rate to that of the *ccq1-T93A* single mutants (**Figure S1**). In  
137 agreement with these results, we further showed that telomere length in *ssu72Δ*  
138 mutants was dependent on Rad3, the kinase responsible for Ccq1-T93  
139 phosphorylation (**Figure S2A**), and not dependent on the checkpoint kinase Chk1  
140 (**Figure S2B**). In addition, *ssu72Δ rad51Δ* double mutants displayed similar telomere  
141 lengths to *ssu72Δ* single mutants (**Figure S2C**). Taken together, our results  
142 demonstrate that Ssu72 is a negative regulator of telomerase, possibly counteracting  
143 Rad3 activation and Ccq1 phosphorylation.

144

## 145 **Ssu72 phosphatase function is independent of Rif1 and Taz1/Rap1/Poz1**

146 In fission yeast, the presence of telomeric ssDNA results in Rad3 activation  
147 and telomere elongation <sup>27</sup>. Thus, we investigated whether *ssu72Δ* mutants  
148 accumulated telomeric ssDNA. We carried out in-gel hybridization assays using a C-  
149 rich probe to measure the accumulation of G-rich DNA at telomeres. Notably, the  
150 *ssu72Δ* mutant strain showed an almost 6-fold increase in G-rich telomere  
151 sequences (**Figure 2A**). We observed that the accumulation of ssDNA at telomeres  
152 is increased in *ssu72Δ* mutants compared to *rif1Δ* mutants, though both strains have  
153 similar telomere lengths. Further, we consistently detected Rad11<sup>RPA</sup>-GFP  
154 localization at telomeres, as measured by live imaging in *ssu72Δ* mutant cells  
155 (**Figure 2B**).

156 Recently, the telomere-binding protein Rif1 was found to control DNA  
157 resection and origin firing by recruiting PP1A phosphatase to double strand breaks  
158 and origins of replication <sup>20–22,29</sup>. We wondered if Rif1 was also responsible for  
159 recruiting the Ssu72 phosphatase to telomeres. To test this hypothesis, we  
160 combined *ssu72Δ* and *ssu72-C13S* (catalytically dead) mutants with *rif1Δ* and  
161 carried out of telomere length epistasis analyses. While single mutants displayed  
162 telomere lengths of 1 Kb, *ssu72Δ rif1Δ* and *ssu72-C13S rif1Δ* double mutants  
163 displayed telomeres that were longer than 3 Kb (**Figure 2C**). Thus, our data show  
164 that Rif1-mediated regulation of telomere length is independent of Ssu72 in fission  
165 yeast.

## 166 **Ssu72 controls telomere length through the Stn1-Ten1 complex**

167 A second highly conserved protein complex regulates telomere length and  
168 telomerase activity. The budding yeast CST complex (Cdc13<sup>CTC1</sup>, Stn1 and Ten1)



169 plays opposing roles at the telomeres. Cdc13 is required for telomerase recruitment  
170 and is activated through its interaction with Est1, a subunit of telomerase <sup>30</sup>. This  
171 interaction is promoted by the phosphorylation of Cdc13 at T308 by Cdk1(Cdc28). In  
172 contrast, the Siz1/2-mediated SUMOylation of Cdc13 at Lys908 promotes its  
173 interaction with Stn1 <sup>31</sup>. This interaction is required, with Ten1, for polymerase alpha  
174 complex recruitment and telomere lagging-strand DNA synthesis <sup>8</sup>. However, the  
175 regulatory mechanism underlying these two opposite functions remains unknown.  
176 Despite the lack of Cdc13<sup>CTC1</sup> homologs in fission yeast, the Stn1-Ten1 complex  
177 appears to play similar roles to those found in budding yeast and mammals  
178 (reviewed in <sup>32</sup>). Consequently, we hypothesized that Ssu72 controls telomere length  
179 through the Stn1-Ten1 complex. Because fission yeast *stn1* and *ten1* deletion  
180 mutants lose telomeres completely and survive only with circular chromosomes <sup>14</sup>,  
181 we carried out our experiments in mutants carrying a hypomorphic *stn1-75* allele <sup>33</sup>.  
182 Similar to *ssu72Δ* mutants, *stn1-75* mutants possess long telomeres (~1 Kb) (**Figure**  
183 **2D**). In contrast to our previous genetic studies, *stn1-75 ssu72Δ* double mutants  
184 displayed similar telomere lengths to those of single mutants. This result suggests  
185 that Ssu72 controls telomere length through the same pathway as the Stn1-Ten1  
186 complex.

187 We then decided to investigate this genetic interaction using a different  
188 strategy. Fission yeast Stn1 is recruited to telomeres in a cell cycle-dependent  
189 manner <sup>34,35</sup>, with peak telomere association in the S/G2 phases of the cell cycle.  
190 This coincides with Ssu72 recruitment to telomeres, as observed in our  
191 synchronization experiments (**Figure 1C**). Given the genetic association, we asked  
192 whether the recruitment of Stn1 to telomeres was dependent on the function of  
193 Ssu72. To test this hypothesis, we performed Stn1-myc ChIP experiments in *ssu72Δ*

194 cells throughout the cell cycle (**Figure 3A**). As has been previously demonstrated,  
195 Stn1-myc was recruited to telomeres in S/G2 cells<sup>36</sup>. We observed that the  
196 recruitment of Stn1 to telomeres was severely impaired in the absence of Ssu72  
197 (**Figure 3A**). Thus, our results indicate that Ssu72 functionality is required for Stn1  
198 recruitment to telomeres.

199         Based on these findings, we asked whether DNA replication dynamics were  
200 affected at *ssu72Δ* mutant chromosome ends. Genomic DNA derived from *WT* and  
201 *ssu72Δ* cells was isolated, subjected to *NsiI* digestion, and analyzed on 2D-gels.  
202 Chromosome ends were revealed by Southern blotting using a telomere-proximal  
203 STE1 probe<sup>6,37</sup>. In the first dimension, we observed three distinct bands for the wt  
204 parental strain but only one thick, smeared band for the *ssu72Δ* strain. As expected,  
205 we observed Y structures derived from passing replication forks within the *NsiI*  
206 fragment in WT cells (**Figure 3B**). In contrast, Y structures were not observed in  
207 *ssu72Δ* mutants. To control for our ability to detect DNA replication in a *ssu72Δ*  
208 background, we analyzed the ribosomal DNA replication fork barrier using BamHI-  
209 digested genomic DNA probed with an rDNA-specific probe (rDNA-RFB). As  
210 expected, replication fork blocks were similarly detected in both WT and *ssu72Δ*  
211 mutant strains. Thus, these results indicate that Ssu72 is required for DNA  
212 replication at chromosome ends, consistent with the role of Ssu72 in regulating Stn1  
213 recruitment to telomeres.

### 214 **Ssu72 regulates Stn1 phosphorylation**

215         Given that Ssu72 phosphatase activity is required to regulate telomere length  
216 and that Ssu72 is recruited to telomeres during the S/G2 phases, we hypothesized  
217 that Ssu72 might regulate Stn1 phosphorylation in a cell cycle-dependent manner.

218 Previous studies have revealed different Cdk1-dependent phosphorylation sites in  
219 Stn1 in budding yeast<sup>38,39</sup>. However, to date, Stn1 phosphorylation sites have not  
220 been identified in species outside of *S. cerevisiae*. Moreover, the phosphorylation  
221 sites described for budding yeast are not conserved in *S. pombe*. Thus, we decided  
222 to take an unbiased approach using mass spectrometry-based analysis of purified  
223 fission yeast Stn1. First, we immunoprecipitated Stn1-myc from cells carrying the  
224 *ssu72Δ* deletion. Subsequent analysis of the immunoprecipitated material revealed a  
225 phosphorylated peptide corresponding to Stn1 Serine-74 (**Figure S3A**). Notably, this  
226 serine is not only conserved in *Schizosaccharomyces* (the fission yeast genus)  
227 (**Figure S3B**) and budding yeast but also throughout higher eukaryotes, including  
228 humans and mice (**Figure 3D**). Therefore, we decided to mutate the Serine-74  
229 residue to aspartic acid (Stn1-S74D), a phosphomimetic amino acid replacement.

230 Cells harboring the *stn1-S74D* mutation exhibited long telomeres (~1 Kb)  
231 similar to those found in *ssu72Δ* cells (**Figure 3C**). We hypothesized that telomere  
232 elongation in the *stn1-S74D* strain was telomerase-dependent. Consistent with this  
233 hypothesis, *stn1-S74D trt1Δ* double mutant telomeres become shorter after  
234 sequential streaks (**Figure S4A**). Importantly, *stn1-S74D ssu72Δ* double mutants  
235 displayed similar telomere lengths to those in *stn1-S74D* single mutants. In addition,  
236 we performed ChIP experiments in strains expressing Stn1-S74D-myc in order to  
237 analyze the recruitment of Stn1 to telomeres. Similar our observations in mutants  
238 lacking *ssu72* phosphatase, Stn1-S74D-myc was not efficiently recruited to  
239 telomeres (**Figure 3E**). Taken together, our data suggest that fission yeast Stn1 is  
240 phosphorylated at Serine-74 to enable its efficient recruitment to telomeres and,  
241 consequently, efficient DNA replication and telomerase regulation.

242           Given that both Stn1 and Ssu72 are recruited to telomeres in the S/G2  
243 phases of the cell cycle and that Stn1-S74 phosphorylation is required for efficient  
244 Stn1 recruitment to telomeres, we wondered if Ssu72 phosphatase could counteract  
245 the action of a cell cycle-dependent kinase. Due to the central nature of Cdc2<sup>Cdk1</sup> in  
246 regulating the cell cycle, we mutated *ssu72+* in cells carrying the *cdc2-M68*  
247 temperature-sensitive mutant allele. At permissive temperatures (25°C), *ssu72Δ*  
248 *cdc2-M68* strains exhibited a similar telomere length to *ssu72Δ* single mutants (**Figure**  
249 **S4B**). To inactivate Cdc2 activity, we grew *ssu72Δ cdc2-M68* strains at semi-  
250 permissive higher temperatures. Our results show that progressive inactivation of  
251 Cdc2<sup>Cdk1</sup> in *ssu72Δ cdc2-M68* double mutants resulted in a gradual decrease in  
252 telomere lengths compared to those in *ssu72Δ* strains. Even though Stn1 Serine-74  
253 does not lie within a conserved CDK consensus site, our data suggest that Cdc2<sup>Cdk1</sup>  
254 activity may counteract Ssu72 phosphatase.

### 255 **Ssu72 is required for DNA replication at chromosome ends**

256           Stn1, part of the CST complex, performs many different functions. In humans,  
257 it has been proposed to be a terminator of telomerase activity due to its higher  
258 affinity for telomeric single stranded DNA formed after telomerase activation<sup>13</sup>.  
259 Further, it has been suggested to promote the restart of stalled replication forks<sup>40,41</sup>.  
260 In fission yeast, the ST complex also exhibits this dual function. First, the binding of  
261 this complex at telomeres inhibits telomerase action through an interaction with  
262 K242-SUMOylated Tpz1 and the SIM domain of Stn1<sup>16,33,35</sup>. Secondly, Stn1  
263 participates in telomere and subtelomere semi-conservative DNA replication<sup>15,16</sup>.

264           Budding yeast CST promotes lagging strand synthesis by interacting with the  
265 catalytic and B-subunits of the DNA polymerase  $\alpha$ -primase complex<sup>8,30,42</sup>. We thus

266 hypothesized that Ssu72 controls the DNA polymerase  $\alpha$ -primase complex at fission  
267 yeast telomeres. To test this hypothesis, we carried out epistasis analyses with the  
268 catalytic subunit of the polymerase  $\alpha$  complex (*pol1<sup>+</sup>*). A hypomorphic mutation in  
269 this subunit results in longer telomeres in fission yeast due to the formation of 3'  
270 overhangs that sustain telomerase activation <sup>5</sup>. As expected, while *pol1-13* had  
271 telomeres of approximately 1 Kb in length, *pol1-13 ssu72 $\Delta$*  double mutants had  
272 similar telomere lengths to single mutants (**Figure 4A**). In addition, we carried out  
273 similar epistasis studies with both RNA primase subunits (Spp1 and Spp2) and  
274 observed that *spp1-9 ssu72 $\Delta$*  and *spp2-9 ssu72 $\Delta$*  double mutants exhibited similar  
275 telomere lengths to those of single mutants (**Figure S5A**). Taken together, these  
276 results indicate that the functionality of Ssu72 at telomeres relies on the activity of  
277 both DNA polymerase  $\alpha$  and RNA primase complexes. Thus, similarly to Stn1,  
278 Ssu72 controls lagging strand synthesis at telomeres (**Figure S5A**).

279 We next investigated if Stn1 overexpression was sufficient to rescue the  
280 telomere defects observed in *ssu72 $\Delta$*  mutants. To test this hypothesis, we replaced  
281 the *stn1<sup>+</sup>* endogenous promoter with inducible Thiamine-regulated *nmt* promoters <sup>43</sup>.  
282 We observed that none of the promoters used to overexpress Stn1 rescued the  
283 telomere defects of *ssu72 $\Delta$*  (**Figure S5B**), indicating that Stn1 overexpression was  
284 unable to compensate for the defects in *ssu72 $\Delta$* .

285 CST in budding yeast regulates lagging strand synthesis by stimulating DNA  
286 polymerase activity through the interaction of Stn1 with Pol1 <sup>11</sup>. Similarly, we  
287 postulated that the mechanism whereby Ssu72 phosphatase controls lagging strand  
288 synthesis is achieved by regulating the Stn1-Pol1 interaction. To test this hypothesis,  
289 we carried out immunoprecipitation experiments using extracts derived from Pol1-

290 Flag and Stn1-Myc tagged strains. As a control, we first verified that we could purify  
291 Ten1-Flag with Stn1-Myc in *ssu72Δ* mutants. We could readily coimmunoprecipitate  
292 Ten1-Flag and Stn1-Myc in both the *wt* and *ssu72Δ* strains (**Figure 4B**). Thus,  
293 Ssu72 phosphatase does not regulate the Stn1-Ten1 interaction. Similar to what has  
294 been observed in budding yeast, we were able to demonstrate the Pol1-Stn1  
295 interaction in these experiments (**Figure 4C**). In contrast, we were unable to  
296 immunoprecipitate Stn1-Myc with Pol1-Flag using an anti-Flag antibody in *ssu72Δ*  
297 cells. Our results show that Ssu72 is required for the interaction of Stn1 with the  
298 polymerase alpha complex, suggesting that Ssu72 functionality relies on Stn1-  
299 dependent activation of lagging strand synthesis.

300 The results of the previous experiment suggested the hypothesis that Ssu72  
301 is required to activate DNA polymerase  $\alpha$  at telomeres. To test this, we  
302 overexpressed the catalytic subunit of polymerase  $\alpha$  (*pol1<sup>+</sup>*) in cells lacking Ssu72.  
303 Previous studies have shown that overexpression of *pol1<sup>+</sup>* was sufficient to rescue  
304 strains with lagging strand synthesis defects <sup>5</sup>. Remarkably, using *pol1<sup>+</sup>* expression  
305 from multicopy plasmids, we showed that overexpression of *pol1<sup>+</sup>* in *ssu72Δ* mutants  
306 is sufficient to rescue telomere defects (**Figure 4D**). Thus, we propose that Ssu72  
307 phosphatase regulates Stn1 phosphorylation status in order to control Stn1  
308 recruitment to telomeres and DNA polymerase  $\alpha$  activation of lagging strand  
309 synthesis. We propose a dynamic model where Rif1 dependent phosphatase  
310 activities regulate telomere replication initiation by controlling origin firing. Further,  
311 we propose that Ssu72 phosphatase functions as a telomere replication terminator  
312 by regulating Stn1 recruitment to telomeres in a cell cycle-dependent manner to  
313 activate lagging strand synthesis, thus ending the telomere replication cycle (**Figure**  
314 **4E**).

## 315 **SSU72 telomere function is conserved throughout evolution**

316 Because Ssu72 is a highly conserved phosphatase and CST has similar  
317 functions in different species, we tested if telomere regulation by SSU72 was  
318 conserved in human cells. We were not able to produce human cell lines lacking  
319 SSU72 using conventional CRISPR/Cas9 technology, suggesting that SSU72 is  
320 essential in humans. In contrast to fission yeast, *SSU72* is an essential gene both in  
321 budding yeast<sup>24,44</sup> and mice<sup>45</sup>. Therefore, we decided to use short hairpin RNAs to  
322 downregulate SSU72 protein levels. This approach has been previously used in  
323 human cells to study the role of SSU72 in mammals<sup>25</sup>.

324 Our results show that, similar to fission yeast, knockdown of SSU72 in human  
325 cells causes telomere dysfunction. We downregulated SSU72 levels using two  
326 specific shRNAs and collected HT1080 cells for analysis of telomere length 6 weeks  
327 after infection. In HT1080 cells, the median telomere length is 3.4 Kb in cells  
328 transfected with a control Luciferase shRNA (**Figure 5A**). As observed in fission  
329 yeast, downregulation of SSU72 using shRNAs against CDS sequence (knockdown  
330 efficiency 85 %) or UTR sequence (knockdown efficiency 92 %) results in an  
331 increase in telomere length to 3.7 Kb and 3.8 Kb, respectively (**Figure 5A**). The  
332 observed telomere elongation results from telomerase activity. To test this, we used  
333 the telomerase inhibitor BIBR1532. Treatment of cells with BIBR1532 resulted not  
334 only in the inhibition of telomere elongation in shSSU72-infected cells but also in a  
335 general decrease in telomere length in all treated cells (**Figure 5A**). Thus, as in  
336 fission yeast, SSU72 controls telomere length by regulating telomerase function in  
337 human cells.

338 We next asked if SSU72 downregulation results in DNA replication defects at  
339 telomeres, as is observed in fission yeast. As in previous studies, we used the  
340 appearance of multitelomeric signals (MTS) as a readout for faulty DNA replication at  
341 telomeres <sup>7</sup>. Following shRNA treatment, we measured MTS in metaphase spreads  
342 of HT1080 cells and observed that, while 9.2% of telomeres showed MTS in control  
343 shLuciferase-treated cells, SSU72 downregulation using either CDS or UTR shRNA  
344 resulted in higher MTS levels (13.4% and 12.8%,  $p \leq 0.01$ ) (**Figure 5B**). Previous  
345 studies have shown that treatment with Aphidicolin, a specific inhibitor of DNA  
346 polymerases, results in higher levels of MTS in mammalian cells <sup>7</sup>. Indeed,  
347 Aphidicolin treatment of HT1080 cells resulted in elevated levels of MTS in control  
348 Luciferase shRNA-treated cells ( $p \leq 0.0001$ ). In contrast, Aphidicolin did not result in  
349 increased MTS levels in cells where SSU72 had been downregulated using shRNAs  
350 against either CDS or UTR ( $p \leq 0.5$  and  $p \leq 0.09$ , respectively) (**Figure 5B**). This result  
351 suggests that higher MTS levels observed in SSU72 downregulated cells are a  
352 consequence of collapsing replication forks, thus highlighting a role of SSU72 in  
353 controlling DNA replication in human cells. Consistent with our results, STN1  
354 downregulation in human cells resulted in increased MTS levels <sup>41</sup>. Moreover, STN1  
355 dysfunction does not increase with Aphidicolin treatment, similar to findings in  
356 SSU72 downregulated cells <sup>41</sup>. In parallel, we observed that the increase in MTS  
357 levels in SSU72 downregulated cells does not depend on telomerase activity. We  
358 observed that SSU72 downregulation is still able to induce higher MTS levels in  
359 U2OS telomerase-negative cells (**Figure S6A**). These data are consistent with STN1  
360 dysfunction, as downregulation of this factor in U2OS cells induces equivalent rates  
361 of replication fork stalling at telomeres <sup>41</sup>.



362 As expected, SSU72 downregulation in HT1080 cells also resulted in  
363 telomere induced foci (TIF), as measured by the localization of 53BP1 to telomeres  
364 (**Figure 6A**). Importantly, TIF formation was not cell line dependent, as we also  
365 observed TIFs in HeLa cells treated with an siRNA against SSU72 (**Figure S6B**).

366 Our data suggest that the downregulation of SSU72 in human cells mimics  
367 previous results obtained in STN1 downregulated cells. Thus, we tested whether  
368 cells lacking SSU72 were defective for STN1 recruitment to telomeres. We  
369 expressed FLAG-tagged STN1 in HT1080 cells and infected these cells with  
370 lentiviral particles expressing an shRNA against either SSU72 or Luciferase. We  
371 then carried out telomeric ChIP experiments using FLAG antibodies (**Figure 6B**).  
372 Upon downregulation of SSU72, we observed a 40% reduction in STN1 binding to  
373 telomeres compared to shLuciferase-treated cells. Together, these data indicate an  
374 evolutionarily conserved role for SSU72 phosphatase in controlling STN1 recruitment  
375 to telomeres and, therefore, in regulating lagging strand syntheses at telomeres.

376

## 377 **Discussion**

378 Protein phosphorylation, a type of post-translational modification, plays key  
379 regulatory roles in almost all aspects of cell biology. Even though the function of  
380 protein kinases in telomere biology has been widely studied, the role of  
381 phosphatases remains relatively less explored. Contrary to this trend, budding yeast  
382 Pph22 phosphatase was recently shown to regulate the phosphorylation of Cdc13 in  
383 a cell cycle-dependent manner<sup>46</sup>. The dephosphorylation of specific Cdc13 residues  
384 by Pph22 reverses the interaction of Cdc13 with Est1 and, consequently, disengages  
385 telomerase from telomeres<sup>46</sup>. However, to date, there are no known phosphatases

386 that regulate telomere length in fission yeast or higher eukaryotes. The data  
387 presented here depict an unprecedented role for a highly conserved phosphatase in  
388 telomere regulation. Ssu72 belongs to the group of class II cysteine-based  
389 phosphatases, which are similar to low molecular weight-phosphatases and some  
390 bacterial arsenate reductases<sup>47</sup>. Although most well-known for its role as an RNA  
391 polymerase II CTD phosphatase in different species<sup>24</sup>, human SSU72 has also been  
392 identified as a protein that can interact with the tumor suppressor Retinoblastoma<sup>48</sup>  
393 and can target STAT3 signaling and Th17 activation in autoimmune arthritis<sup>49</sup>. Other  
394 functions have been reported in human cells, including SA2 dephosphorylation<sup>25</sup>.  
395 Consistent with the multiple known roles of phosphatases, our work demonstrates  
396 that Ssu72 phosphatase also regulates telomere replication by controlling the  
397 recruitment of Stn1 to telomeres and promoting the Stn1-Pol1 interaction, thus  
398 activating lagging strand DNA synthesis.

399 At present, it is not well understood how lagging strand DNA replication  
400 inhibits telomerase activity. In fission yeast, Rad3 kinase is activated by the  
401 generation of ssDNA during DNA replication, leading to telomerase recruitment  
402 through the phosphorylation of Ccq1 at Thr93<sup>27</sup>. In this model, fill-in reactions by  
403 lagging strand polymerases reduce ssDNA at telomeres, thus contributing to a  
404 negative feedback loop. Consistent with the role of telomeric ssDNA in activating  
405 telomerase in fission yeast, *ssu72Δ* cells have longer overhangs, extensive  
406 phosphorylation of Ccq1 and higher levels of telomerase at telomeres. In addition,  
407 Rad3 and Ccq1-T93 phosphorylation are both required for the elongation of  
408 telomeres in *ssu72Δ* mutants. Therefore, it is still possible that Ssu72 phosphatase  
409 activity is required to regulate Ccq1 phosphorylation. Further experiments will be  
410 required to test this hypothesis.

411 Our work revealed that phosphorylation of Stn1 at Serine-74 is required for  
412 the regulation of telomere length. Mutation of Stn1 Serine-74 to Aspartic acid (D), an  
413 amino acid that mimics constitutive phosphorylation, results in telomeric elongation  
414 that is epistatic with the *ssu72Δ* mutation. This result indicates that Serine-74  
415 phosphorylation is sufficient to explain the regulation of telomere length by Ssu72.  
416 The phosphorylation site identified in our mass spectrometry analysis resides within  
417 the OB fold domain of Stn1. OB fold phosphorylation is known to regulate protein-  
418 DNA binding and protein-protein interactions. For example, phosphorylation of  
419 human TPP1 (Tpz1 ortholog) in the OB fold domain regulates the telomerase-TPP1  
420 interaction<sup>50</sup>. In fission yeast, our data suggest that Stn1 phosphorylation at Serine  
421 74 may prevent its binding to telomeric DNA in early S phase. Even though Serine  
422 74 does not lie in a CDK consensus site, Cdc2<sup>CDK1</sup> is likely to be the kinase  
423 responsible for Stn1 phosphorylation. Unlike other kinases, such as Hsk1<sup>CDC7</sup>,  
424 telomeric elongation in *ssu72Δ* mutants is reversed with increased inactivation of  
425 Cdc2 activity. Ssu72 counteracts Stn1 exclusion as it arrives at telomeres.  
426 Interestingly, Ssu72 is recruited to telomeres in the S/G<sub>2</sub> phases concomitantly with  
427 the lagging strand machinery<sup>51</sup>. Although further experiments are required, an  
428 attractive model involves Cdc2<sup>CDK1</sup> phosphorylation of Stn1, thus creating a delay in  
429 lagging strand synthesis and allowing telomere elongation. Further, Ssu72  
430 phosphatase reverses this process by promoting Stn1 binding to DNA polymerase  
431 alpha (**Figure 4E**) Notably, dephosphorylation of Stn1 has to be coordinated with  
432 Tpz1 SUMOylation, which is crucial for the recruitment of Stn1 to telomeres. Thus,  
433 both phospho- / dephosphorylation and SUMOylation-mediated interactions with  
434 Tpz1 control the recruitment and activity of telomeric Stn1-Ten1.

435           The SSU72 phosphatase appears to be conserved throughout evolution. The  
436 absence of a human SSU72 homolog in the HT1080 cell line results in similar  
437 phenotypes to those observed in fission yeast *ssu72Δ* mutants. First, SSU72  
438 downregulation in HT1080 cells triggers DNA damage signaling at telomeres.  
439 Second, SSU72 depletion results in telomerase-dependent telomere elongation.  
440 Third, the recruitment of STN1 to telomeres is defective in SSU72-depleted HT1080  
441 cells. Consistently, we observed increased telomere fragility (MTS) in SSU72-  
442 depleted cells, a phenotype also observed in STN1-deficient cells<sup>13</sup>. We propose  
443 that SSU72 regulates STN1 recruitment to human telomeres in a manner similar to  
444 that in fission yeast. Currently, there is no evidence of STN1 phosphorylation in  
445 human cells. Nevertheless, Serine-74 is conserved in humans as an amino acid  
446 capable of being phosphorylated (T81). Further analysis will determine if human  
447 STN1 is phosphorylated at this residue and whether this modification regulates  
448 human telomere replication.

449           Recently, a model was proposed in which the replication fork regulates  
450 telomerase activity<sup>18</sup>. This model describes how the regulation of origin firing and  
451 passage of the replication fork affect telomere homeostasis. In addition, we propose  
452 that telomere replication is controlled by two sets of phosphatases. On the one hand,  
453 the onset of telomere replication is regulated by Rif1-PP1A phosphatase through the  
454 inhibition of DDK activity at subtelomere origins of replication. On the other hand, we  
455 now show that telomere lagging strand synthesis is regulated by Ssu72  
456 phosphatase, which promotes the Stn1-polymerase alpha interaction, thus  
457 terminating telomere replication and resulting in telomerase inhibition.

458

## 459 **Acknowledgments**

460 We thank Dr. Nakamura, Dr. Nurse, Dr. Carr, Dr. Cooper and Dr. Bianchi for  
461 sharing their strains and Dr. Wang and Dr. Lingner for sharing their plasmids. We are  
462 grateful to Dr. Tomita, Dr. Jansen, Dr. Carlos, and Dr. Sridhar for reading the  
463 manuscript and to MGF laboratory for critical comments and discussions. This work  
464 was supported by the Portuguese Fundação Ciência e tecnologia (FCT) project  
465 number PTDC/BEX-BCM/5179/14. JME is supported by PTDC/BEX-BCM/5179/14  
466 and PIEF-GA-2013-624759 and ESMC is supported by SFRH/BD/113754/2015. SM  
467 is supported by the Ligue Nationale Contre le Cancer (LNCC, Equipe Labellisée  
468 Vincent Géli). SC is supported by Projet Fondation ARC and by the Agence  
469 Nationale de la Recherche (ANR-16-CE12 TeloMito). IML acknowledges FCT for  
470 PhD fellowship funding (PD/BD/113982/2015) under the MolBioS PhD-Program  
471 (PD/00133/2012). IAA acknowledges IF/00764/2014 Research unit GREEN-IT  
472 "Bioresources for Sustainability" (UID/Multi/04551/2013). Mass spectrometry  
473 analyses were performed at UniMS (ITQB/iBET).

## 474 **Author Contributions**

475 MGF and JME conceived the study and designed the experiments. JME and  
476 ESMC performed the majority of the experiments. MG and CR performed the fission  
477 yeast genetic screen. SC and SM performed the 2D gel experiments. IML and IA  
478 performed the mass spectrometry analysis. MGF and JME wrote the manuscript.  
479 MGF supervised the research.

## 480 **Declaration of Competing Interests**

481 The authors declare no competing interests

## 482 **Material and methods**

### 483 **Yeast strains and media**

484 The strains used in this work are listed in *Supplementary Table 1*. Strains were  
485 constructed using commonly used techniques (Smith et al., 1999). Standard media  
486 and growth conditions were used throughout this work (Barinaga, 1997). For the  
487 strains containing pREP41 plasmids cultures were grown overnight in media PMG  
488 (Pombe Glutamate Medium) with the required amino acids. To generate the *ssu72-*  
489 *C13S*, *ssu72<sup>+</sup>* gene was cloned into pGEM vector using genomic DNA. pGEM vector  
490 was mutagenized to create the pGEM-Ssu72-C13S. Endogenous *ssu72<sup>+</sup>* gene was  
491 deleted using a *ura4<sup>+</sup>* fragment and FOA plates were used to select for Ssu72-C13S  
492 recombinants. Colonies were then screened for proper integration and sequenced to  
493 verify the presence of the point mutation. For *stn1-S74D* mutant strain, a genomic  
494 DNA fragment containing the *stn1<sup>+</sup>* gene was cloned into pJK210 plasmid and  
495 mutagenized to create the pJK210 *stn1-S74D*. The *PacI*-linearized pJK210 *stn1-*  
496 *S74D* plasmid was transformed into wild-type strain, and cells were plated on  
497 minimum medium lacking uracil. Ura4 positive cells were streaked on FOA-plate to  
498 select for direct-repeat recombination between *stn1<sup>+</sup>* and *stn1-S74D* allele.  
499 Presence of the *stn1-S74D* allele was subsequently verified by genomic sequencing.

### 500 **Southern blot analysis**

501 Fission Yeast: Genomic DNA was obtained from exponentially growing yeast cells by  
502 phenol-chloroform extraction method. Human cells DNA was extracted as described  
503 in <sup>7</sup>. Approximately 2 µg of digested *Apal* or *EcoRI* DNA in Fission yeast or *AluI* and  
504 *MboI* for human cells was run in either 1 % (fission yeast) or 0.6 % (human cells)  
505 agarose gels. The gel was transferred to a positively charged nylon membrane, and

506 telomere analysis was performed as described (Rog et al., 2009) or (Reverter et al.,  
507 2010).

### 508 **Chromatin Immunoprecipitation (ChIP)**

509 In Fission yeast, ChIP was performed as described (Moser et al., 2009). Briefly,  
510 exponentially growing cells were fixed with 1 % formaldehyde, 0.1M NaCl, 1mM  
511 EDTA, 50mM HEPES-KOH, pH 7.5 and Incubated 20 min at room temperature.  
512 Then, the solution was quenched with 0,25 M glycine (final concentration) for 5  
513 minutes. After 2 washes with cold PBS, cells were lysed with 2 x lysis buffer (100  
514 mM Hepes-KOH, pH 7.5 2 mM EDTA 2% Triton X-100 0.2% Na Deoxycholate) and  
515 disrupted by mechanical method. Chromatin was sheared, and equal amounts of  
516 DNA were used for immunoprecipitation protocol with either anti-Myc (9E10; Santa  
517 Cruz biotechnology) or anti-Flag (M2-F4802; Sigma) with magnetic Protein A beads.  
518 After washing the DNA-protein complexes with 1st (lysis buffer/0.1% SDS/275 mM  
519 NaCl), 2nd (lysis buffer/0.1% SDS/500 mM NaCl), 3rd (10 mM Tris-HCl, pH 8.0, 0.25  
520 M LiCl, 1 mM EDTA, 0.5% NP-40, 0.5% Na Deoxycholate), Recovered DNA by 50  
521 mM Tris-HCl, pH 7.5, 10mM EDTA, 1% SDS was decrosslinked, purified and  
522 analysed in triplicate by SYBR-Green-based real-time PCR (Bio-Rad) using the  
523 primers described in <sup>52</sup>.

524 For Human Chip, cells were fixed in 1% formaldehyde in PBS and incubated 15 min  
525 at room temperature. After quenching with Glycine, cells were lysed with 1% SDS,  
526 50 mM Tris-HCl pH 8.0, 10 mM EDTA. After sonicating the chromatin, the diluted  
527 DNA protein complexes were incubated with Flag magnetic beads (Sigma M8823)  
528 overnight. After 3 consecutive washes, with 1x in IP buffer (20 mM Tris pH8, 0.15 M  
529 NaCl, 1% Triton X-100, 2 mM EDTA) with 0.1% SDS, 1x in IP buffer with 0.1% SDS,

530 0.5 M NaCl, and 10 mM Tris pH8.0, 1 mM EDTA with 1% Nonidet, 1% Na  
531 deoxycholate and 0.25 M LiCl. Complexes were eluted with 50 mM Tris pH 8.0, 10  
532 mM EDTA, 1% SDS. Decrosslinked DNA was denatured and slot-blotted into a  
533 Hybond N+ membrane using a Bio-Rad blotter. Southern blot using a human  
534 telomere probe was carried out as described before <sup>53</sup>.

### 535 **Immunoblotting**

536 Whole-cell extracts prepared using exponentially growing yeast cells were processed  
537 for western blotting as previously described (Rog et al., 2009). Common western blot  
538 techniques were used to detect different proteins. For detection of Myc tagged  
539 proteins, we used anti-Myc monoclonal antibody (9E10; Santa Cruz) or rabbit anti-  
540 Myc (abcam). For detection of Flag-tagged proteins we used a Flag–M2 antibody  
541 (SIGMA - F1804).

### 542 **Immunoprecipitation**

543 Exponentially growing yeast cells were lysed with IP Buffer x2 (50 mM HEPES [pH  
544 7.5], 150 mM NaCl, 40 mM EDTA, triton 0.5% 0.1% NP40, 0.5 mM Na<sub>3</sub>VO<sub>4</sub>, 1 mM  
545 NaF, 2 mM PMSF, 2 mM benzamidine 10 % glycerol, Complete proteinase inhibitor  
546 + DNase 10 u/ml). Equal amount of proteins was incubated with Flag–M2 (SIGMA -  
547 F1804) overnight followed by 3 washes for 10 minutes with IP buffer + 0.5 M NaCl.  
548 Common western blot techniques were then used to detect proteins.

### 549 **Mass spectrometry analysis**

550 Stn1 protein was purified by tagging C-terminus with 13-myc tag. 5 liters of  
551 Logarithmic cycling cells were collected and lysed with 50 mM HEPES [pH 7.5], 150  
552 mM NaCl, 40 mM EDTA, 0.2% Triton, 0.1% NP40, 0.5 mM Na<sub>3</sub>VO<sub>4</sub>, 1 mM NaF, 2



553 mM PMSF, 2 mM benzamidine, 10 % glycerol, DNase I and Complete proteinase  
554 inhibitor. Cell lysates were incubated overnight with magnetic beads coated with Myc  
555 antibody (9E-10, Pierce). The immunoprecipitated was washed and run on a 4-12%  
556 Bis-Tris NuPAGE gel (Invitrogen). A slice of gel ranging between 75 and 63 kDa was  
557 excised and tryptic peptides were prepared by *in-gel* digestion<sup>54</sup>. Peptides were  
558 analyzed by nanoLC-MS using an Ekspert 425 nanoLC with cHiPLC (Eksigent, AB  
559 Sciex, Framingham, MA USA) coupled to a TripleTOF™ 6600 mass spectrometer  
560 (AB Sciex, Framingham, MA, USA).

561 Spectra were searched against Swiss-Prot database (downloaded in 10/2017, 5201  
562 entries) containing all the reviewed protein sequences available for *S. pombe*, and  
563 three human keratin sequences (P04264, P35908, P13645). The Paragon algorithm  
564 embedded in ProteinPilot 5.0 software (AB Sciex, Framingham, MA USA) was used  
565 to perform the database search using phosphorylation emphasis and gel based ID as  
566 special factors, and biological modifications as ID focus. An independent false  
567 discovery rate (FDR) analysis was carried out using the target-decoy approach  
568 provided with Protein Pilot software and positive identifications were achieved using a  
569 global FDR threshold below 1%.

## 570 **Two-dimensional (2D) gel electrophoresis**

571 2D gel electrophoresis experiments were carried out as described in<sup>55</sup>. 10 µg of  
572 DNA (for telomeres analysis) was digested with 60U of *NsiI*. For analysis of the RFB  
573 region, 5 µg of DNA was digested with 60 U of *BamHI*. DNA was run on 0.4%  
574 agarose gel for the first dimension and a 1% agarose gel for the second dimension.  
575 Gels were transferred to positively charged membranes and probed with the STE1  
576 probe or the 1.35-kb *EcoRI-EcoRI* rDNA fragment.

## 577 **Human lentiviral infections**

578 HT1080 cell line were infected with either Luciferase shRNA (target sequence  
579 CGCTGAGTACTTCGAAATGTC), CDS shRNA (target sequence  
580 CAAAGACCTGTTTGATCTGAT) or UTR shRNA (target sequence  
581 ACGGTAGCATTACCCAAATAA) lentiviral particles produced in 293T cells by mixing  
582 PLKO vectors with psPax2 and pVSVG vectors. Cells were infected twice and  
583 selected with puromycin at 3 micrograms/ml.

## 584 **Metaphase spreads**

585 Metaphases were collected by adding Colcemid to the media to a 0.1 µg/ml final  
586 concentration for 4 hours to overnight. Metaphases were collected using the shake  
587 off method. Cells were then incubated in hypotonic buffer (0.03M Na citrate) for 30  
588 minutes and fixed with Methanol:acetic acid (3:1) solution. Slides were pre-washed  
589 with 45% acetic acid spread metaphases.

## 590 **Fluorescence In Situ Hybridization (FISH)**

591 For FISH using telomere probes, slides were washed in PBS 3x5min each with  
592 rotation and incubated with 10 mM Tris, pH7.5 and a deionized formamide 70%  
593 telomere probe (0.5 ng/ml), blocking reagent (0.25%, 25 mM MgCl<sub>2</sub>, 9mM citric acid,  
594 82mM Na<sub>2</sub>HPO<sub>4</sub>, pH7.0) at 80°C for 3 minutes. Slides were then enclosed in a  
595 humidifier chamber for 3 hours. After serial washes of 70% formamide, 10 mM Tris,  
596 0.1% BSA (2 times for 15 minutes) and PBS-Tween 0.05% (3 times for 5 minutes),  
597 slides were dried and mounted with mounting media with 1 µg/ml DAPI. For slides  
598 with metaphase spreads a first step of 37 % pepsin digestion (0.1 g/100 ml + 88 µl  
599 HCl) before starting the FISH technique

## 600 **Microscopy**

601 In fission yeast, cells were grown at 32°C in PMG with all supplements added. For  
602 each individual experiment, at least 100 cells were analysed. For GFP and mRFP  
603 visualization, live cells were imaged using a Delta Vision Core System (Applied  
604 Precision) using a 100× 1.4 numerical aperture UplanSApo objective and a  
605 cascade2 EMCCD camera (Photometrics). Deconvolution was performed using the  
606 enhanced ratio method in softWoRx software. Co-localization experiments were  
607 performed using maximum intensity projections of deconvolved images.

608 For Immunofluorescence-FISH analysis in human cells, cells were fixed in 2-4%  
609 formaldehyde in PBS for 10 min at RT. After SDS (0.03%) permeabilization and 15  
610 min blocking step (1% BSA, 0.5% Triton X-100, 0.5% Tween 20), 53PB1 antibody  
611 (1:1000; Santa Cruz biotechnology H-300) was incubated overnight. Antibody was  
612 washed 3 times with PBS-Tween 0.05% and a secondary antibody conjugated with  
613 alexa 488 (1:400) was used<sup>56</sup>. Before starting the FISH technique, fixation of the  
614 cells was performed using 2-4 % formaldehyde for 10 min at room temperature.

615 **Figure legends**

616 **Figure 1. Genetic screen identifies Ssu72 as telomerase regulator.** A) We  
617 identified previously unknown telomere regulators in fission yeast using the haploid  
618 *S. pombe* whole-genome gene deletion library including *ssu72*<sup>+</sup> (SPAC3G9.04). B)  
619 Telomere length in *wt*, *ssu72*Δ and *ssu72-C13S* (point mutant on the phosphatase  
620 active site) strains were measured by Southern Blot in *ApaI* digested samples using  
621 a telomeric probe. C) Ssu72 recruitment to telomeres is cell cycle regulated. Ssu72  
622 was myc-tagged in a *cdc25*<sup>ts</sup> strain and ChIP analysis was carried out in cell cycle  
623 synchronized populations. Septa formation was used as readout for S-phase. n ≥ 3;  
624 \**p* ≤ 0.05 based on a two-tailed Student's t-test to *ssu72*<sup>+</sup> control samples. Error bars  
625 represent standard error of the mean (SEM). D) Telomere length of *ssu72*Δ is  
626 dependent on telomerase. Diploid strains with the appropriate phenotypes were  
627 sporulated and double mutants *trt1*Δ *ssu72*Δ were streaked for multiple passages  
628 (triangle indicates increased number of generations). E) Telomerase is recruited to  
629 telomeres in the absence of Ssu72. ChIP analysis for Trt1-myc in *wt* and *ssu72*Δ  
630 was performed as described in material and methods using a non-tagged strain as a  
631 control. n ≥ 3; \**p* ≤ 0.05 based on a two-tailed Student's t-test to control sample. Error  
632 bars represent standard error of the mean (SEM). F) The telomerase activator Ccq1  
633 is phosphorylated in *ssu72*Δ cells. *rap1*Δ cells were used as positive control.  
634 Western blots were performed using Ccq1-flag tagged strains.

635 **Figure 2. Ssu72 is required for telomeric C-strand.** A) *ssu72*Δ telomeres present  
636 longer G-rich overhangs than *wt* and *rif1*Δ telomeres. In-gel hybridization in native  
637 and denaturing conditions was labelled with a radiolabelled C-rich telomere probe  
638 and quantified for ssDNA at the telomeres. n = 2; \**p* ≤ 0.05 based on a two-tailed

639 Student's t-test to control sample. Error bars represent Standard error of the mean  
640 (SEM). B) RPA (Rad11-GFP) is enriched at *ssu72* $\Delta$  telomeres. Colocalization of  
641 Rad11-GFP with Taz1-mCherry, used as a telomere marker, was performed in *wt*  
642 and *ssu72* $\Delta$  cells; n =3; \**p*  $\leq$ 0.05 based on a two-tailed Student's t-test to control  
643 sample. Error bars represent standard error of the mean (SEM). More than 1000  
644 cells were analyzed in each phenotype C) *ssu72*<sup>+</sup> controls telomere length  
645 independently of *rif1*<sup>+</sup>. Epistasis analysis of telomere length of *ssu72* $\Delta$  and *ssu72*-  
646 C13S (catalytically inactive mutant) with *rif1* $\Delta$  was performed by Southern blotting of  
647 *ApaI* digested DNA using a telomeric probe. D) *ssu72*<sup>+</sup> and *stn1*<sup>+</sup> regulate telomere  
648 length in the same genetic pathway. Epistasis analysis of *ssu72* $\Delta$  and *stn1-75*  
649 performed by Southern blotting of *ApaI* digested DNA using a telomeric probe. Two  
650 independently generated *ssu72* $\Delta$  *stn1-75* double mutants are shown.

651 **Figure 3. Ssu72 controls Stn1 telomere recruitment and phosphorylation.** A)  
652 Ssu72 is required for telomere recruitment of Stn1 in late S phase. ChIP analysis of  
653 *stn1-myc* in *wt* and *ssu72* $\Delta$  cells was performed in synchronized *cdc25<sup>ts</sup>* cells. n  $\geq$  3;  
654 \**p*  $\leq$ 0.05 based on a two-tailed Student's t-test to *ssu72*<sup>+</sup> control samples. Error bars  
655 represent standard error of the mean (SEM). B) 2D-gel analysis of *NsiI* telomeric  
656 fragments of *wt* and *ssu72* $\Delta$  strains. Smart ladder from *Eurogentec* was used for  
657 DNA size measurement. C) Serine 74 substitution to a phosphomimetic aspartate  
658 amino acid (*stn1-S74D*) is sufficient to confer *ssu72* $\Delta$  telomere defects. Telomere  
659 length epistasis analysis of *ssu72* $\Delta$  and *stn1-S74D* mutants were performed by  
660 Southern blotting of *ApaI* digested genomic DNA using a telomeric probe. D)  
661 Sequence alignment of Stn1 highlighting serine 74 identified in fission yeast as a  
662 phosphorylated residue. E) Similar to *ssu72* $\Delta$  mutants, *stn1-S74D* is defective in  
663 telomere recruitment. ChIP analysis of *stn1-myc* and *stn1-S74D-myc* using a non-

664 tagged strain as a control.  $n = 3$ ;  $*p \leq 0.05$  based on a two-tailed Student's t-test to  
665 control sample. Error bars represent standard error of the mean (SEM).

666 **Figure 4. Ssu72 is required for polymerase  $\alpha$  activation.** A) *ssu72*<sup>+</sup> and DNA  
667 polymerase  $\alpha$  regulate telomere length in the same genetic pathway. Epistasis  
668 analysis of *ssu72* $\Delta$  and *pol1-13* performed by Southern blotting of *ApaI* digested  
669 DNA using a telomeric probe. B) and C) Stn1-Pol1 interaction requires Ssu72.  
670 Immunoprecipitation experiments of Pol1-Flag with Stn1-Myc was performed both in  
671 *wt* and *ssu72* $\Delta$  mutants. As control we carried out immunoprecipitation experiments  
672 of Ten1-Flag with Stn1-Myc in either *wt* or *ssu72* $\Delta$  D) overexpression of polymerase  
673 alpha rescues telomere defect in *ssu72* $\Delta$  cells. Multi-copy vector with polymerase  $\alpha$   
674 under thiamine promoter were expressed both in *wt* or *ssu72* $\Delta$  cells. E) Proposed  
675 model for Ssu72 regulation of telomere replication in fission yeast. See text for  
676 details.

677 **Figure 5. Down-regulation of human SSU72 results in telomere elongation**  
678 **and fragility.** A) Telomere elongation of SSU72 down-regulated cells is telomerase  
679 dependent. HT1080 cells infected with lentiviral particles carrying two independent  
680 shRNAs against SSU72 (CDS and UTR regions) and control Luciferase (Luc)  
681 shRNA. Knockdown efficiencies were determined by RT-qPCR using specific  
682 primers against hSSU72. Quantification of Telomere restriction fragment analysis  
683 (TRFs) was carried out. B) hSSU72 down-regulation results in multi-telomeric signals  
684 (MTS) that are dependent on DNA replication. Visualisation of mitotic spreads of  
685 HT1080 hSSU72 shRNA cells treated with Aphidicolin and colcemid. FISH was  
686 carried out using a PNA- telomeric probe. Quantification of MTS:  $n=3$ ;  $**p \leq 0.01$   $****p$

687  $\leq 0.0001$  based on a two-tailed Student's t-test to control sample. Error bars  
688 represent standard error of the mean (SEM).

689 **Figure 6. hSSU72 is required for hSTN1 recruitment to telomeres.** A) hSSU72  
690 downregulation results in telomere DNA damage foci (TIF). Cells with indicated  
691 shRNAs were fixed and IF-FISH was carried out using a 53BP1 antibody and PNA-  
692 telomere probes. Quantification of cells with more than 5 telomeric 53BP1 foci  
693 observed in A:  $n=3$ ;  $**p \leq 0.01$  based on a two-tailed Student's t-test to control  
694 sample. Error bars represent standard error of the mean (SEM). B) hSSU72 is  
695 required for efficient loading of hSTN1 at human telomeres. CHIP analysis was  
696 preformed using a FLAG antibody and Southern blotting was carried out using a  
697 human telomeric probe. Quantification of 3 independent CHIP experiments  $*p \leq 0.05$   
698  $**p \leq 0.01$  based on a two-tailed Student's t-test to control sample. Error bars  
699 represent standard error of the mean (SEM).

700

701 **Supplementary table 1** List of strains used in this manuscript

702



## 703 Bibliography

- 704 1. Palm, W. & de Lange, T. How shelterin protects mammalian telomeres. *Annu*  
705 *Rev Genet* **42**, 301–334 (2008).
- 706 2. Hanahan, D. & Weinberg, R. A. Hallmarks of cancer: the next generation. *Cell*  
707 **144**, 646–674 (2011).
- 708 3. Maestroni, L., Matmati, S. & Coulon, S. Solving the Telomere Replication  
709 Problem. *Genes (Basel)* **8**, (2017).
- 710 4. Greider, C. W. & Blackburn, E. H. Identification of a specific telomere terminal  
711 transferase activity in Tetrahymena extracts. *Cell* **43**, 405–413 (1985).
- 712 5. Dahlen, M. *et al.* Replication proteins influence the maintenance of telomere  
713 length and telomerase protein stability. *Mol Cell Biol* **23**, 3031–3042 (2003).
- 714 6. Miller, K. M., Rog, O. & Cooper, J. P. Semi-conservative DNA replication  
715 through telomeres requires Taz1. *Nature* **440**, 824–828 (2006).
- 716 7. Sfeir, A. *et al.* Mammalian telomeres resemble fragile sites and require TRF1  
717 for efficient replication. *Cell* **138**, 90–103 (2009).
- 718 8. Grossi, S., Puglisi, A., Dmitriev, P. V, Lopes, M. & Shore, D. Pol12, the B  
719 subunit of DNA polymerase alpha, functions in both telomere capping and  
720 length regulation. *Genes Dev.* **18**, 992–1006 (2004).
- 721 9. Wu, L., Shiozaki, K., Aligue, R. & Russell, P. Spatial organization of the Nim1-  
722 Wee1-Cdc2 mitotic control network in *Schizosaccharomyces pombe*. *Mol. Biol.*  
723 *Cell* **7**, 1749–1758 (1996).
- 724 10. Lin, J. J. & Zakian, V. A. The *Saccharomyces* CDC13 protein is a single-strand  
725 TG1-3 telomeric DNA-binding protein in vitro that affects telomere behavior in  
726 vivo. *Proc. Natl. Acad. Sci. U. S. A.* **93**, 13760–5 (1996).
- 727 11. Lue, N. F., Chan, J., Wright, W. E. & Hurwitz, J. The CDC13-STN1-TEN1  
728 complex stimulates Pol  $\alpha$  activity by promoting RNA priming and primase-to-  
729 polymerase switch. *Nat. Commun.* **5**, 5762 (2014).
- 730 12. Surovtseva, Y. V *et al.* Conserved telomere maintenance component 1  
731 interacts with STN1 and maintains chromosome ends in higher eukaryotes.  
732 *Mol. Cell* **36**, 207–18 (2009).
- 733 13. Chen, L.-Y. Y., Redon, S. & Lingner, J. The human CST complex is a  
734 terminator of telomerase activity. *Nature* **488**, 540–4 (2012).
- 735 14. Martín, V., Du, L.-L., Rozenzhak, S. & Russell, P. Protection of telomeres by a  
736 conserved Stn1-Ten1 complex. *Proc. Natl. Acad. Sci. U. S. A.* **104**, 14038–43  
737 (2007).
- 738 15. Takikawa, M., Tarumoto, Y. & Ishikawa, F. Fission yeast Stn1 is crucial for  
739 semi-conservative replication at telomeres and subtelomeres. *Nucleic Acids*  
740 *Res.* **45**, 1255–1269 (2017).

- 741 16. Matmati, S. *et al.* The fission yeast Stn1-Ten1 complex limits telomerase  
742 activity via its SUMO-interacting motif and promotes telomeres replication. *Sci.*  
743 *Adv.* **4**, eaar2740 (2018).
- 744 17. Chang, Y.-T. T., Moser, B. a. & Nakamura, T. M. Fission yeast shelterin  
745 regulates DNA polymerases and Rad3(ATR) kinase to limit telomere  
746 extension. *PLoS Genet* **9**, e1003936 (2013).
- 747 18. Greider, C. W. Regulating telomere length from the inside out: the replication  
748 fork model. *Genes Dev.* **30**, 1483–91 (2016).
- 749 19. Hayano, M. *et al.* Rif1 is a global regulator of timing of replication origin firing in  
750 fission yeast. *Genes Dev.* **26**, 137–150 (2012).
- 751 20. Mattarocci, S. *et al.* Rif1 Controls DNA Replication Timing in Yeast through the  
752 PP1 Phosphatase Glc7. *Cell Rep.* **7**, 62–69 (2014).
- 753 21. Hiraga, S. -i. *et al.* Rif1 controls DNA replication by directing Protein  
754 Phosphatase 1 to reverse Cdc7-mediated phosphorylation of the MCM  
755 complex. *Genes Dev.* **28**, 372–383 (2014).
- 756 22. Davé, A., Cooley, C., Garg, M. & Bianchi, A. Protein Phosphatase 1  
757 Recruitment by Rif1 Regulates DNA Replication Origin Firing by Counteracting  
758 DDK Activity. *Cell Rep.* **7**, 53–61 (2014).
- 759 23. Hiraga, S.-I. *et al.* Human RIF1 and protein phosphatase 1 stimulate DNA  
760 replication origin licensing but suppress origin activation. *EMBO Rep.* **18**, 403–  
761 419 (2017).
- 762 24. Krishnamurthy, S., He, X., Reyes-Reyes, M., Moore, C. & Hampsey, M. Ssu72  
763 Is an RNA polymerase II CTD phosphatase. *Mol Cell* **14**, 387–394 (2004).
- 764 25. Kim, H.-S. S. *et al.* The hsSsu72 phosphatase is a cohesin-binding protein that  
765 regulates the resolution of sister chromatid arm cohesion. *EMBO J.* **29**, 3544–  
766 57 (2010).
- 767 26. Vanoosthuysse, V. *et al.* CPF-Associated Phosphatase Activity Opposes  
768 Condensin-Mediated Chromosome Condensation. *PLoS Genet.* **10**, e1004415  
769 (2014).
- 770 27. Moser, B. A. *et al.* Tel1ATM and Rad3ATR kinases promote Ccq1-Est1  
771 interaction to maintain telomeres in fission yeast. *Nat Struct Mol Biol* **18**, 1408–  
772 1413 (2012).
- 773 28. Yamazaki, H., Tarumoto, Y. & Ishikawa, F. Tel1(ATM) and Rad3(ATR)  
774 phosphorylate the telomere protein Ccq1 to recruit telomerase and elongate  
775 telomeres in fission yeast. *Genes Dev.* **26**, 241–6 (2012).
- 776 29. Zimmermann, M., Lottersberger, F., Buonomo, S. B., Sfeir, A. & de Lange, T.  
777 53BP1 regulates DSB repair using Rif1 to control 5' end resection. *Science*  
778 **339**, 700–4 (2013).
- 779 30. Qi, H. & Zakian, V. A. The *Saccharomyces* telomere-binding protein Cdc13p  
780 interacts with both the catalytic subunit of DNA polymerase alpha and the

- 781 telomerase-associated est1 protein. *Genes Dev.* **14**, 1777–88 (2000).
- 782 31. Hang, L. E., Liu, X., Cheung, I., Yang, Y. & Zhao, X. SUMOylation regulates  
783 telomere length homeostasis by targeting Cdc13. *Nat Struct Mol Biol* **18**, 920–  
784 926 (2011).
- 785 32. Giraud-Panis, M.-J. J. *et al.* CST meets shelterin to keep telomeres in check.  
786 *Mol Cell* **39**, 665–676 (2010).
- 787 33. Garg, M. *et al.* Tpz1TPP1 SUMOylation reveals evolutionary conservation of  
788 SUMO-dependent Stn1 telomere association. *EMBO Rep* **15**, 871–877 (2014).
- 789 34. Moser, B. A. *et al.* Differential arrival of leading and lagging strand DNA  
790 polymerases at fission yeast telomeres. *EMBO J* **28**, 810–820 (2009).
- 791 35. Miyagawa, K. *et al.* SUMOylation regulates telomere length by targeting the  
792 shelterin subunit Tpz1(Tpp1) to modulate shelterin-Stn1 interaction in fission  
793 yeast. *Proc Natl Acad Sci U S A* **111**, 5950–5955 (2014).
- 794 36. Moser, B. A. & Nakamura, T. M. Protection and replication of telomeres in  
795 fission yeast. *Biochem Cell Biol* **87**, 747–758 (2009).
- 796 37. Audry, J. *et al.* RPA prevents G-rich structure formation at lagging-strand  
797 telomeres to allow maintenance of chromosome ends. *EMBO J* **34**, 1942–1958  
798 (2015).
- 799 38. Gopalakrishnan, V., Tan, C. R. & Li, S. Sequential phosphorylation of CST  
800 subunits by different cyclin-Cdk1 complexes orchestrate telomere replication.  
801 *Cell Cycle* **16**, 1271–1287 (2017).
- 802 39. Liu, C. C., Gopalakrishnan, V., Poon, L. F., Yan, T. & Li, S. Cdk1 regulates the  
803 temporal recruitment of telomerase and Cdc13-Stn1-Ten1 complex for  
804 telomere replication. *Mol Cell Biol* **34**, 57–70 (2014).
- 805 40. Gu, P. *et al.* CTC1 deletion results in defective telomere replication, leading to  
806 catastrophic telomere loss and stem cell exhaustion. *EMBO J* **31**, 2309–2321  
807 (2012).
- 808 41. Stewart, J. A. *et al.* Human CST promotes telomere duplex replication and  
809 general replication restart after fork stalling. *EMBO J* **31**, 3537–3549 (2012).
- 810 42. Chandra, A., Hughes, T. R., Nugent, C. I. & Lundblad, V. Cdc13 both positively  
811 and negatively regulates telomere replication. *Genes Dev.* **15**, 404–14 (2001).
- 812 43. Basi, G., Schmid, E. & Maundrell, K. TATA box mutations in the  
813 *Schizosaccharomyces pombe* nmt1 promoter affect transcription efficiency but  
814 not the transcription start point or thiamine repressibility. *Gene* **123**, 131–136  
815 (1993).
- 816 44. Ganem, C. *et al.* Ssu72 is a phosphatase essential for transcription termination  
817 of snoRNAs and specific mRNAs in yeast. *EMBO J.* **22**, 1588–98 (2003).
- 818 45. Kim, S. H. *et al.* Hepatocyte homeostasis for chromosome ploidy and  
819 liver function is regulated by Ssu72 protein phosphatase. *Hepatology* **63**, 247–

- 820 259 (2016).
- 821 46. Shen, Z. J. *et al.* PP2A and Aurora differentially modify Cdc13 to promote  
822 telomerase release from telomeres at G2/M phase. *Nat Commun* **5**, 5312  
823 (2014).
- 824 47. Alonso, A. & Pulido, R. The extended human PTPome: a growing tyrosine  
825 phosphatase family. *FEBS J* **283**, 2197–2201 (2016).
- 826 48. St-Pierre, B. *et al.* Conserved and specific functions of mammalian ssu72.  
827 *Nucleic Acids Res.* **33**, 464–77 (2005).
- 828 49. Lee, S. H. *et al.* Ssu72 attenuates autoimmune arthritis via targeting of STAT3  
829 signaling and Th17 activation. *Sci Rep* **7**, 5506 (2017).
- 830 50. Zhang, Y. *et al.* Phosphorylation of TPP1 regulates cell cycle-dependent  
831 telomerase recruitment. *Proc Natl Acad Sci U S A* **110**, 5457–5462 (2013).
- 832 51. Moser, B. A., Subramanian, L., Khair, L., Chang, Y. T. & Nakamura, T. M.  
833 Fission yeast Tel1(ATM) and Rad3(ATR) promote telomere protection and  
834 telomerase recruitment. *PLoS Genet* **5**, e1000622 (2009).
- 835 52. Carneiro, T. *et al.* Telomeres avoid end detection by severing the checkpoint  
836 signal transduction pathway. *Nature* **467**, 228–232 (2010).
- 837 53. Sfeir, A. & de Lange, T. Removal of shelterin reveals the telomere end-  
838 protection problem. *Science (80-. )*. **336**, 593–597 (2012).
- 839 54. Luís, I. M., Alexandre, B. M., Oliveira, M. M. & Abreu, I. A. Selection of an  
840 Appropriate Protein Extraction Method to Study the Phosphoproteome of  
841 Maize Photosynthetic Tissue. *PLoS One* **11**, e0164387 (2016).
- 842 55. Noguchi, E., Noguchi, C., Du, L.-L. & Russell, P. Swi1 prevents replication fork  
843 collapse and controls checkpoint kinase Cds1. *Mol. Cell. Biol.* **23**, 7861–74  
844 (2003).
- 845 56. Badie, S. *et al.* BRCA2 acts as a RAD51 loader to facilitate telomere  
846 replication and capping. *Nat. Struct. Mol. Biol.* **17**, 1461–9 (2010).
- 847

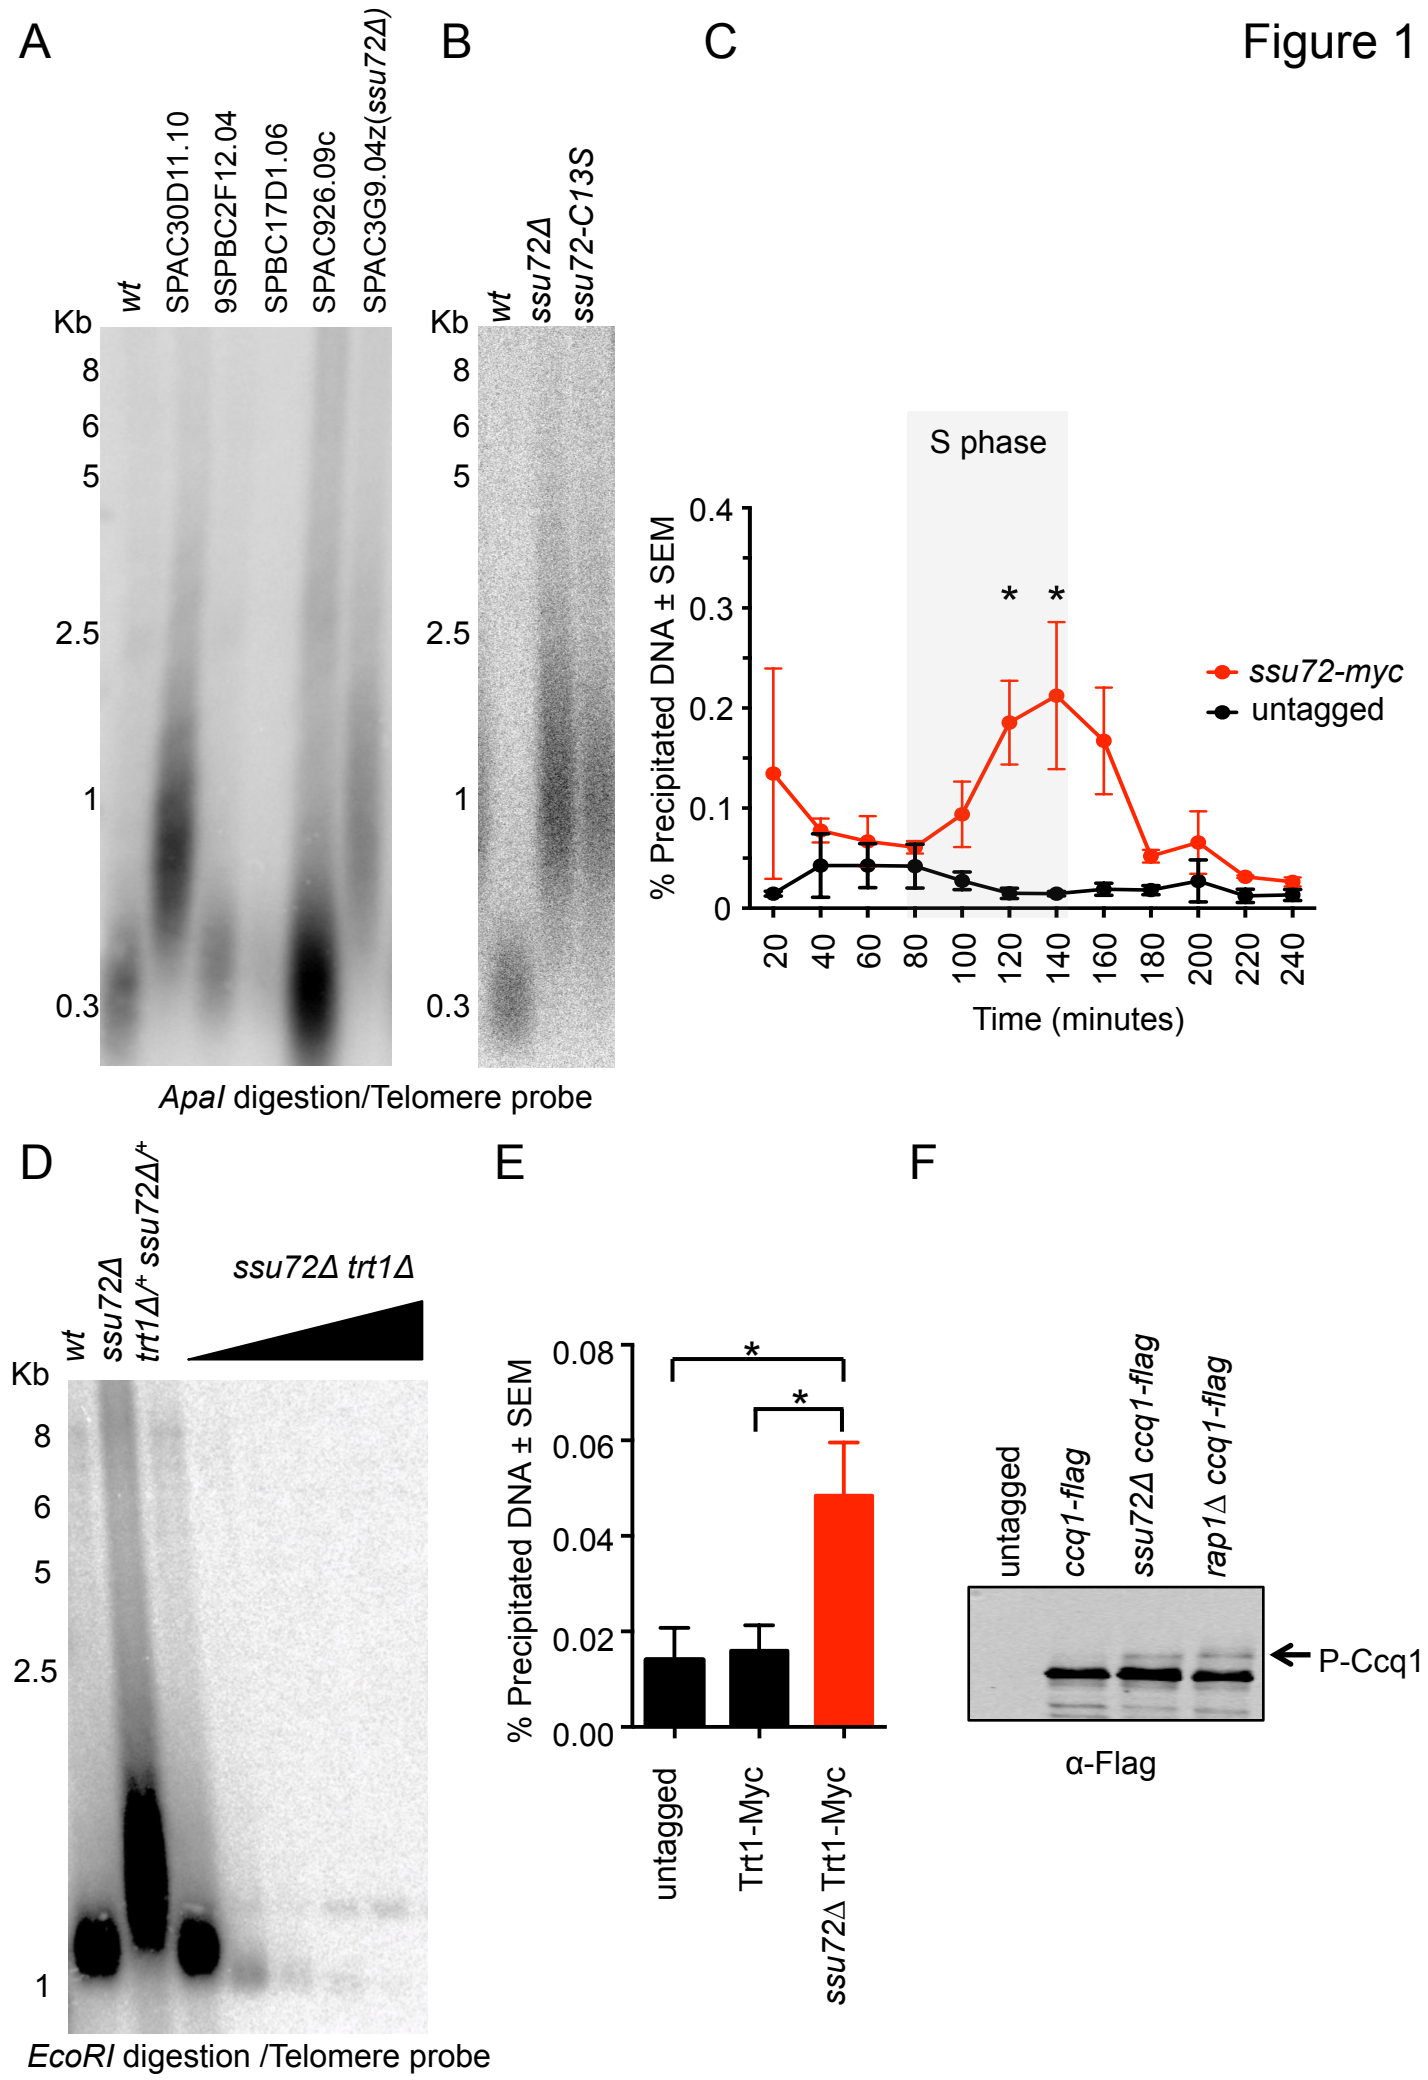

Figure 2

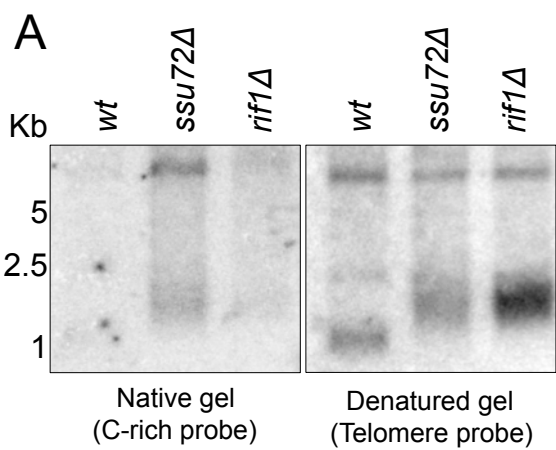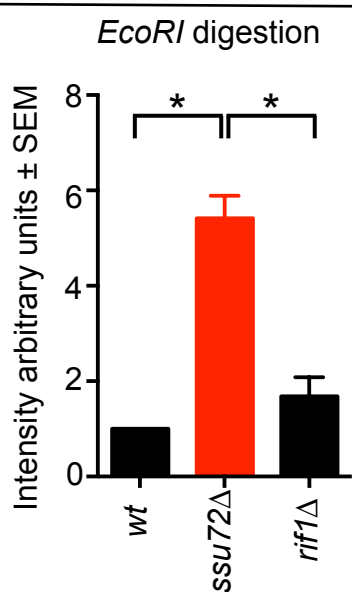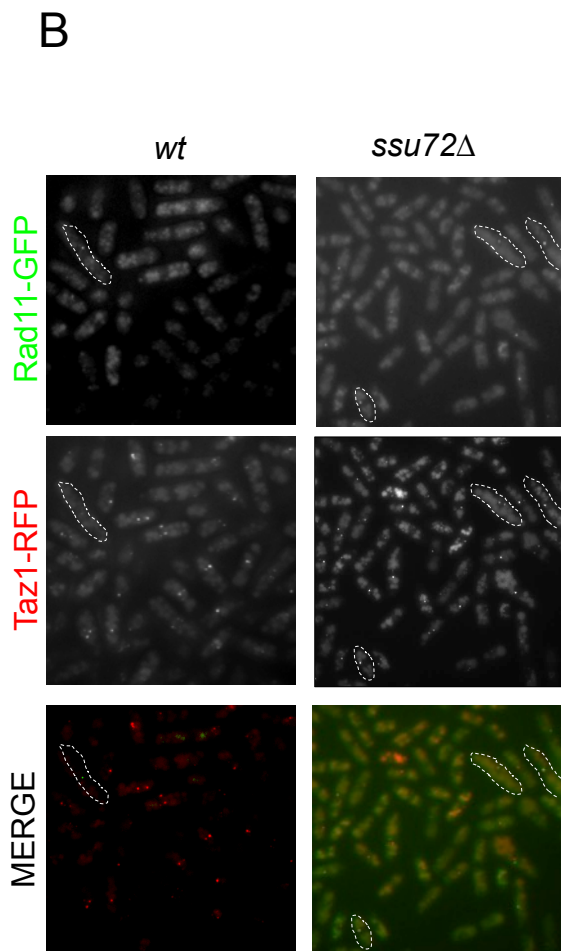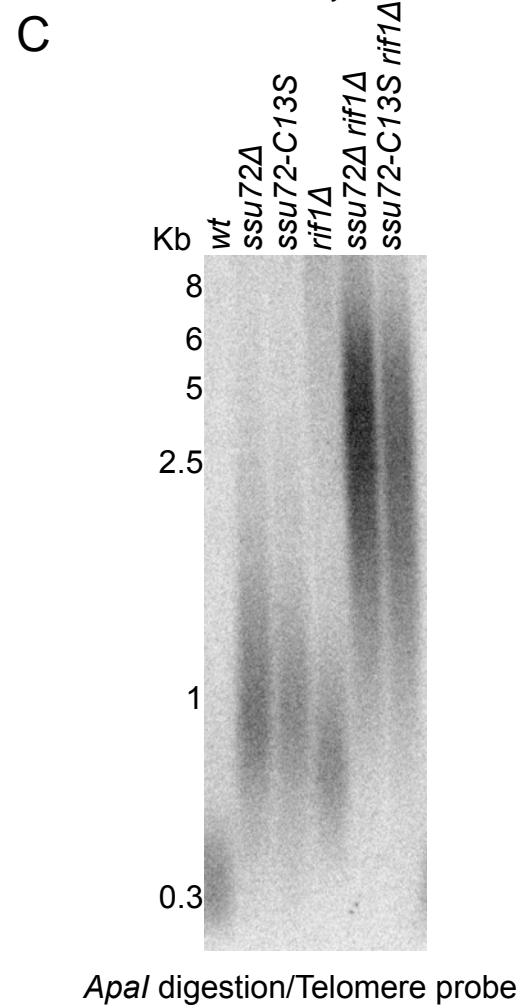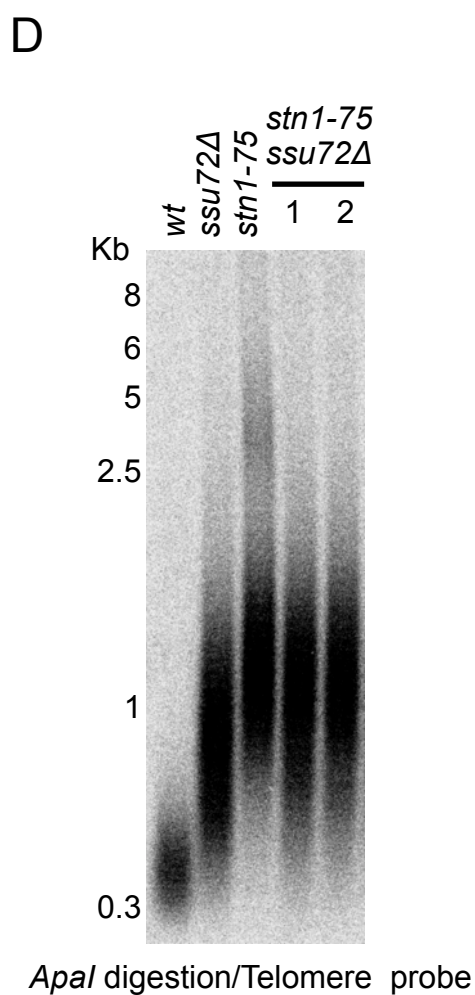

A

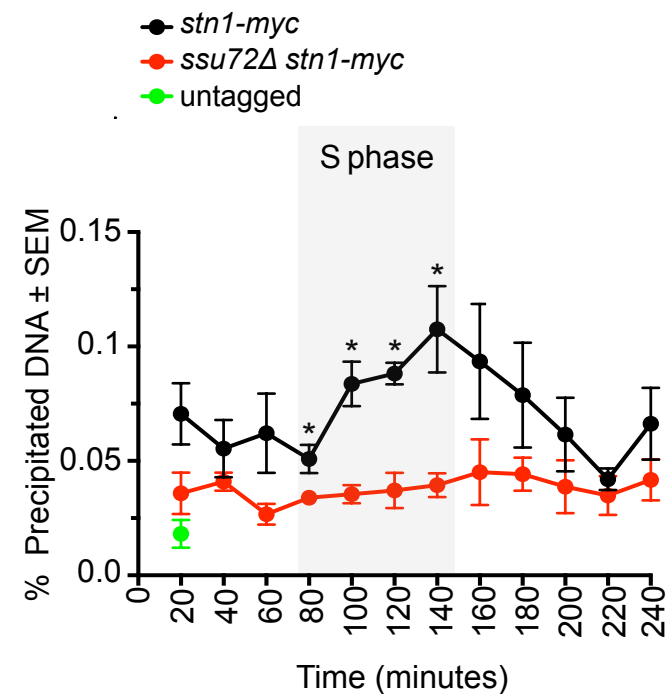

B

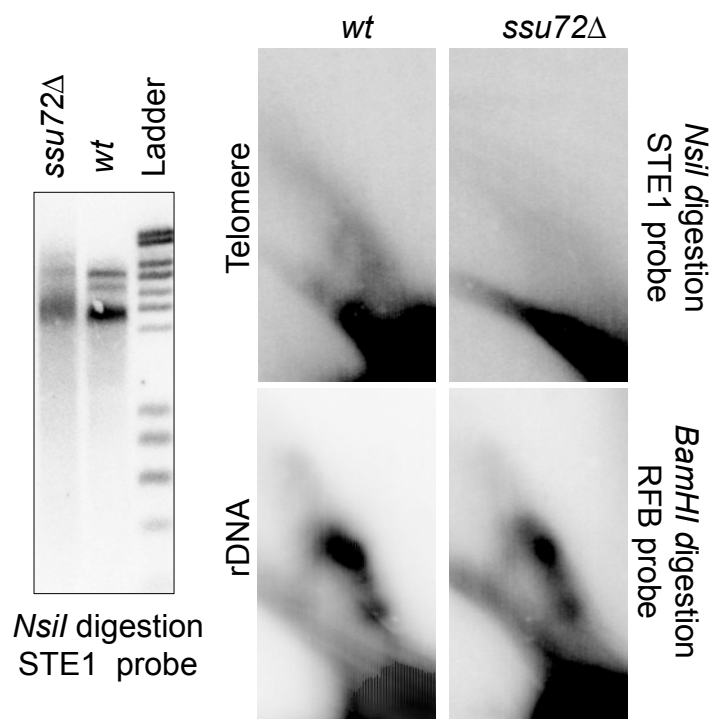

C

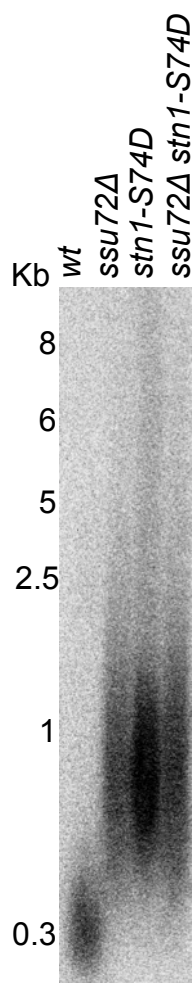

Apal digestion/ Telomere probe

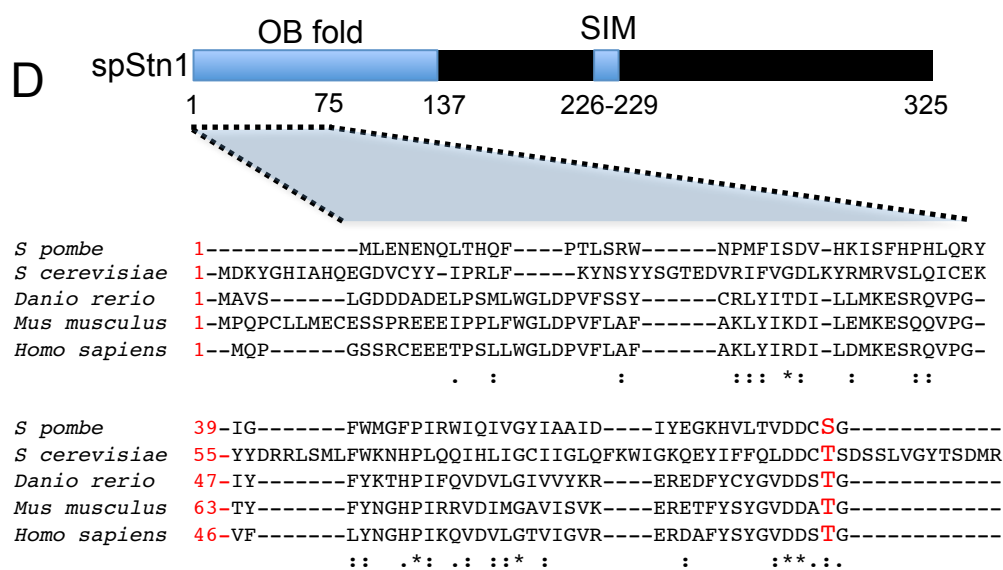

E

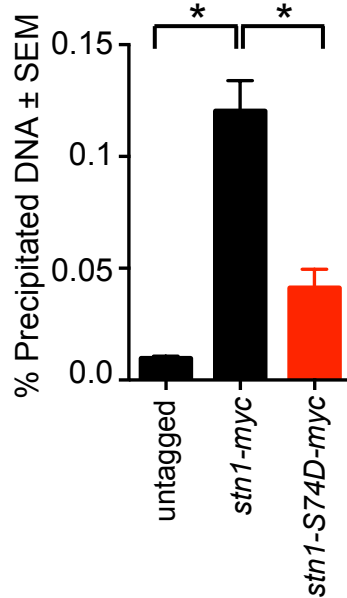

A

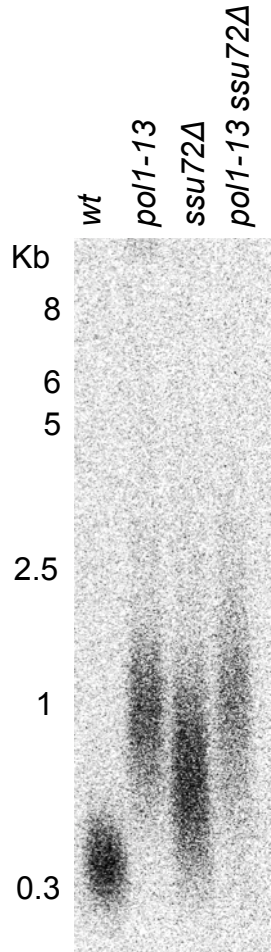

*Apal* digestion/ Telomere probe

B

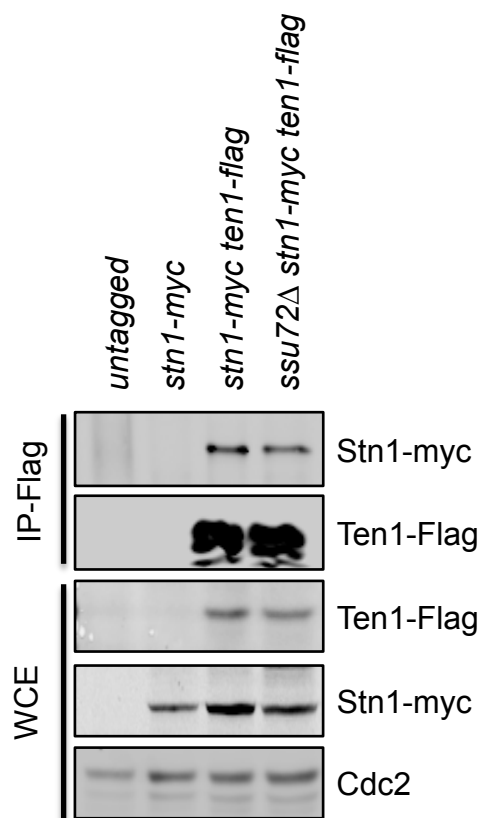

C

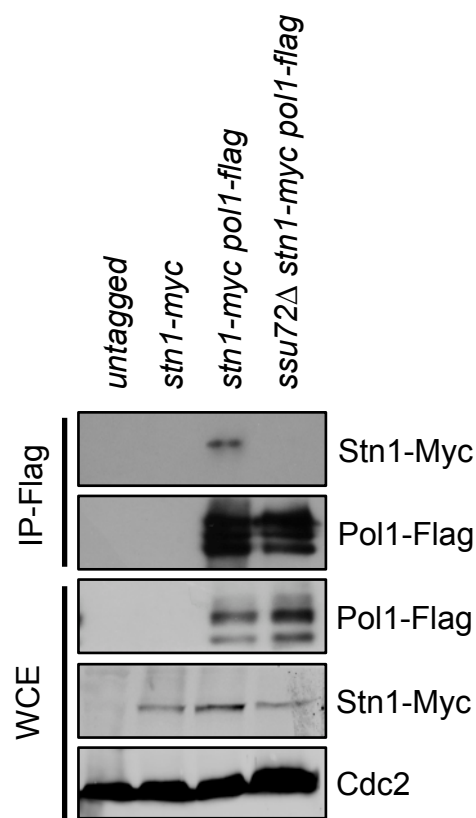

D

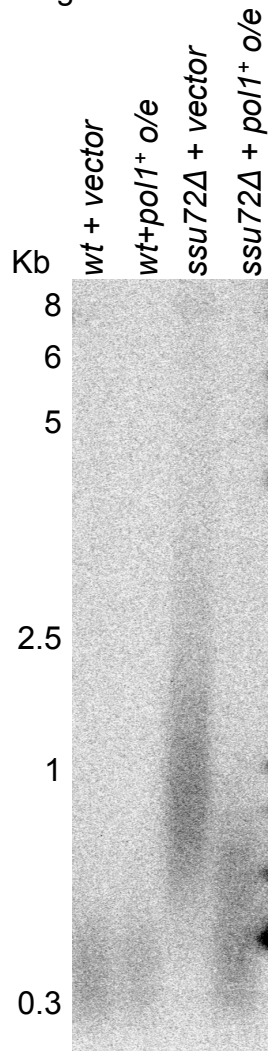

*Apal* digestion/ Telomere probe

E

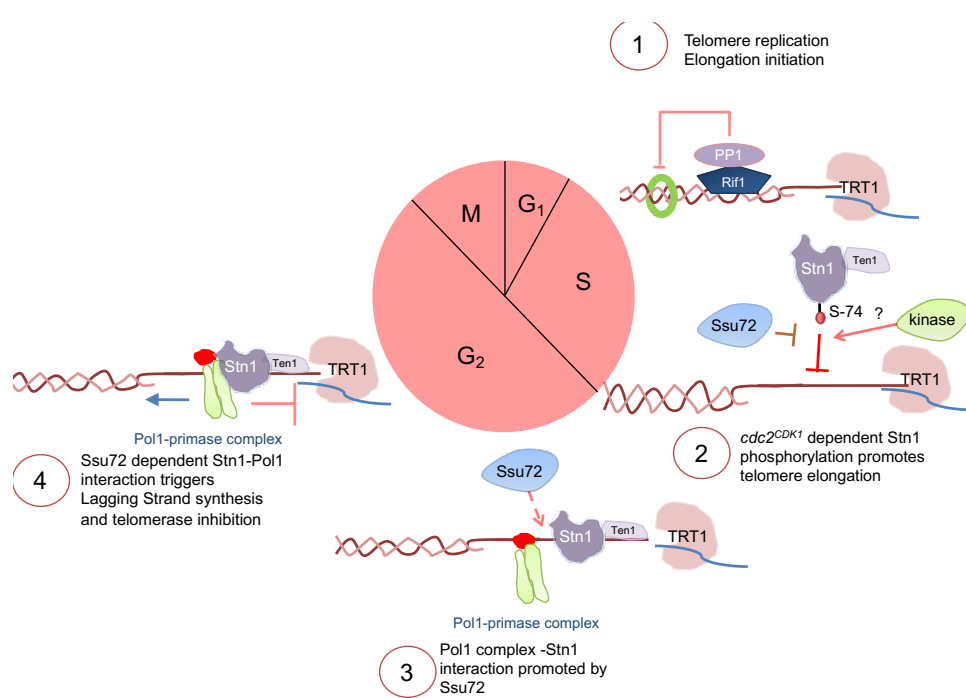



A

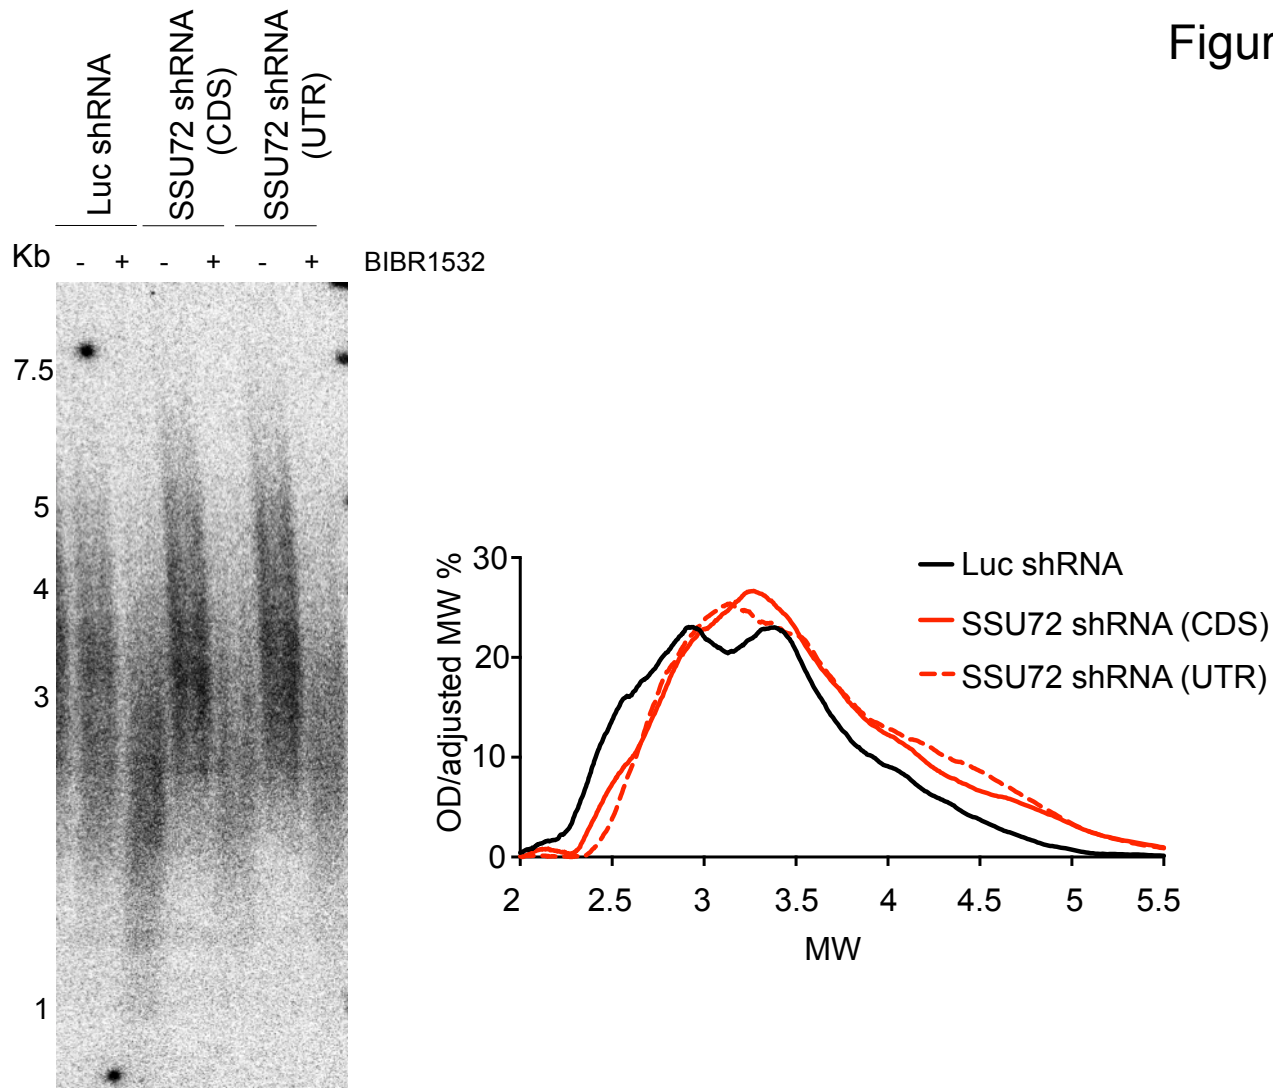

B

Telomere probe

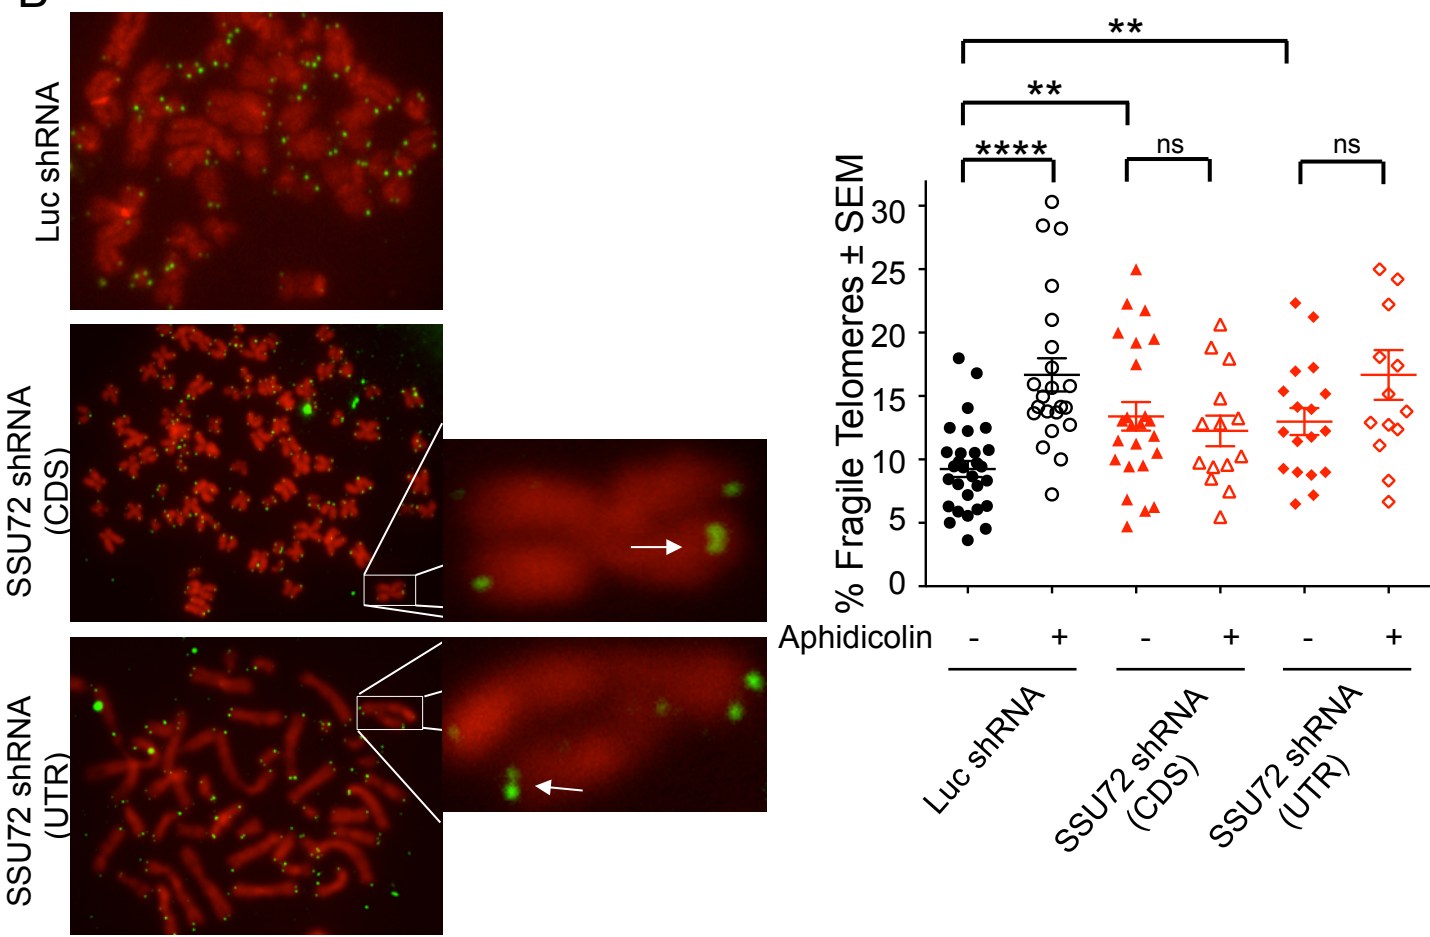

**A**

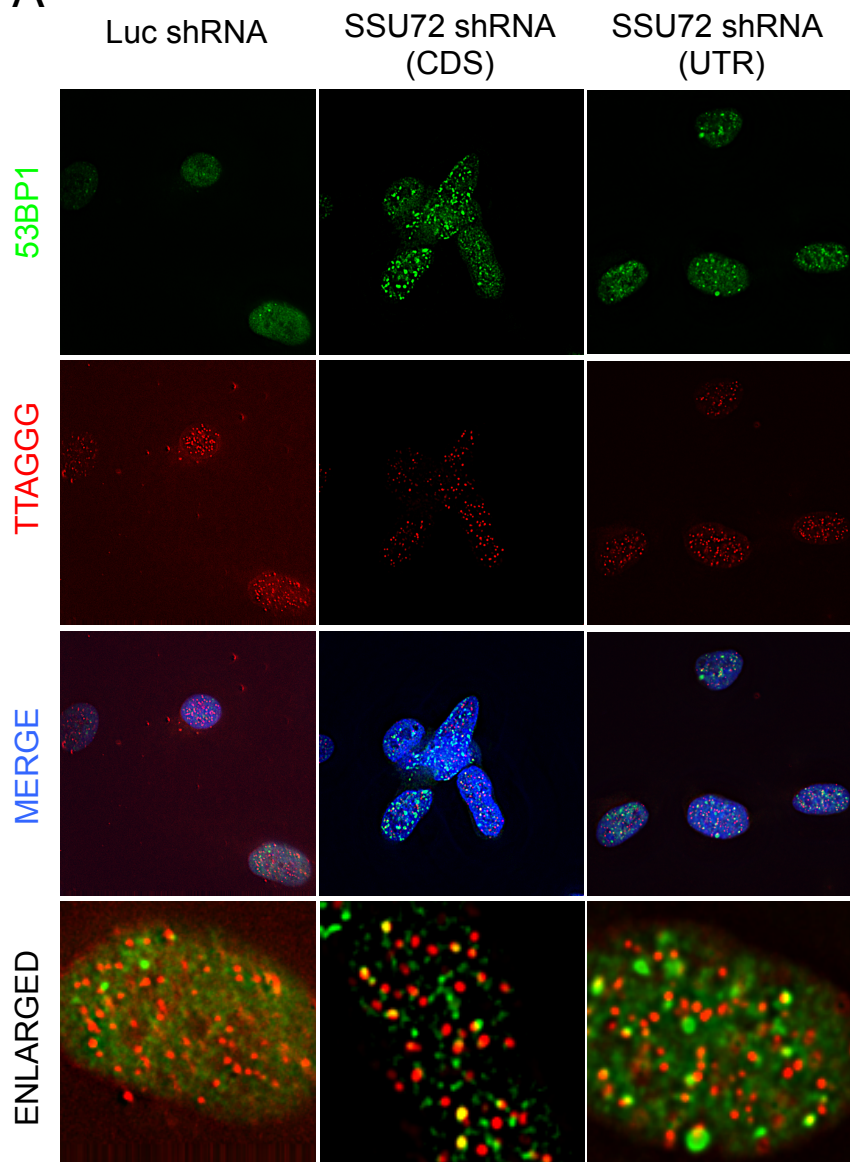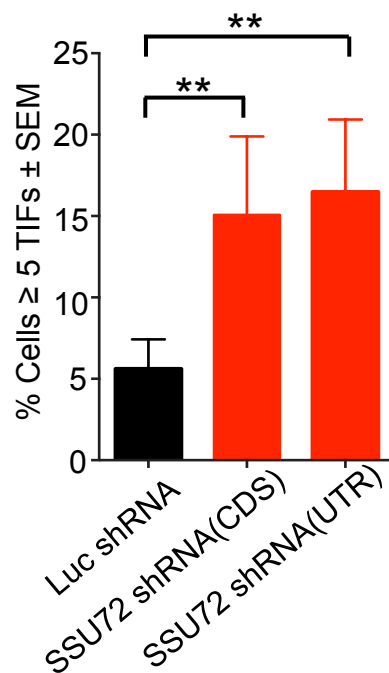

**B**

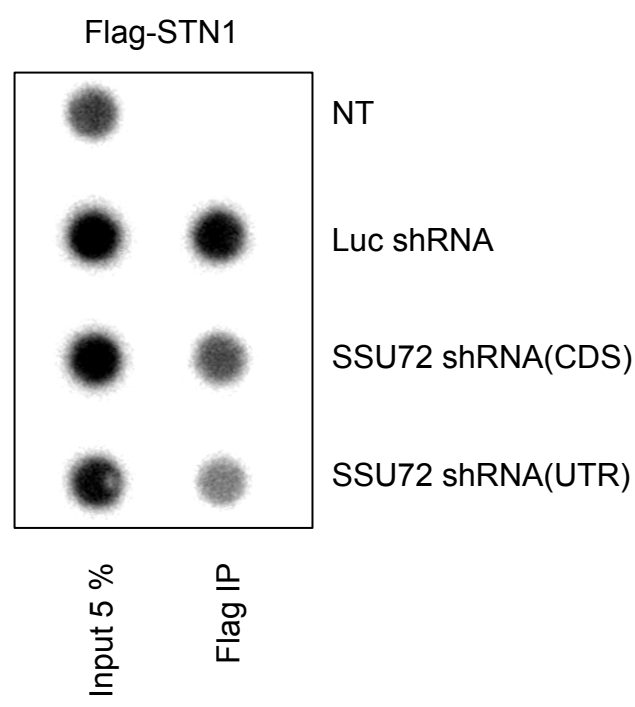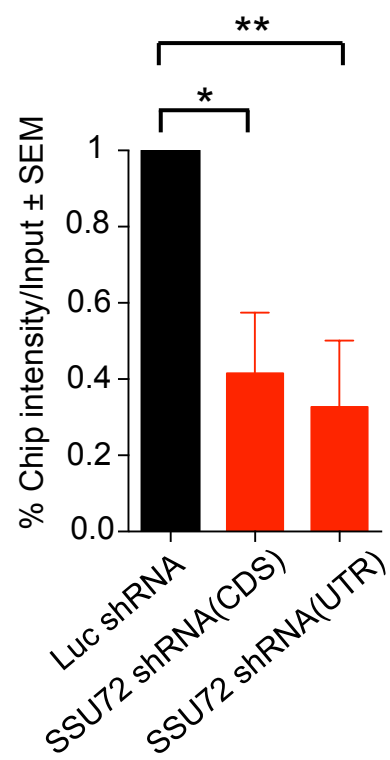

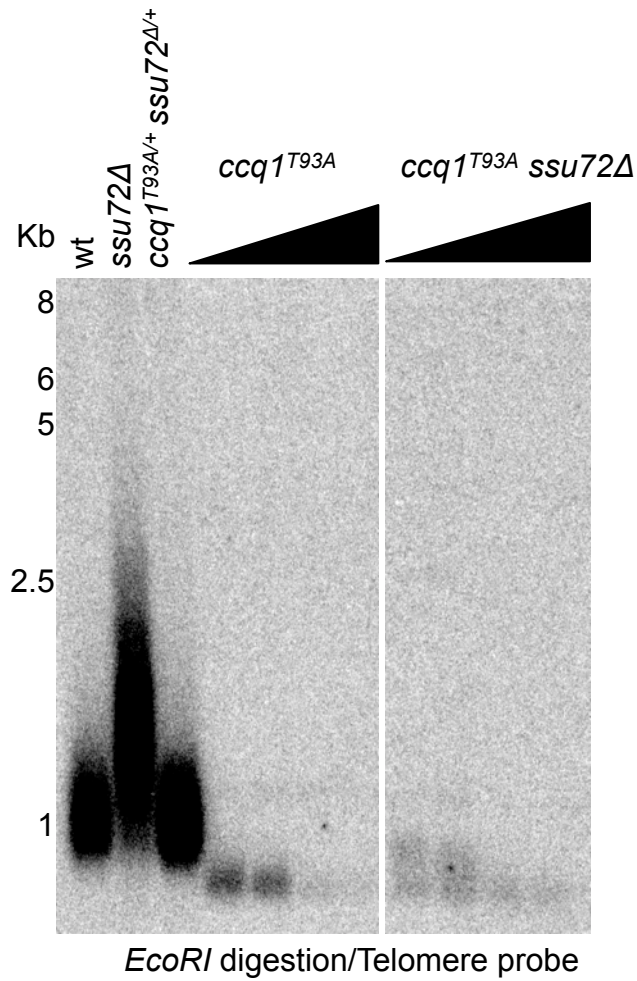

**Figure S1. Phosphorylation of Ccq1 in Threonine93 is required for telomere elongation in *ssu72* mutant.** Diploid strains with the appropriate phenotypes were sporulated and streaked for different passages. Telomere length was measured in *EcoRI* digested DNA by a telomeric probe.

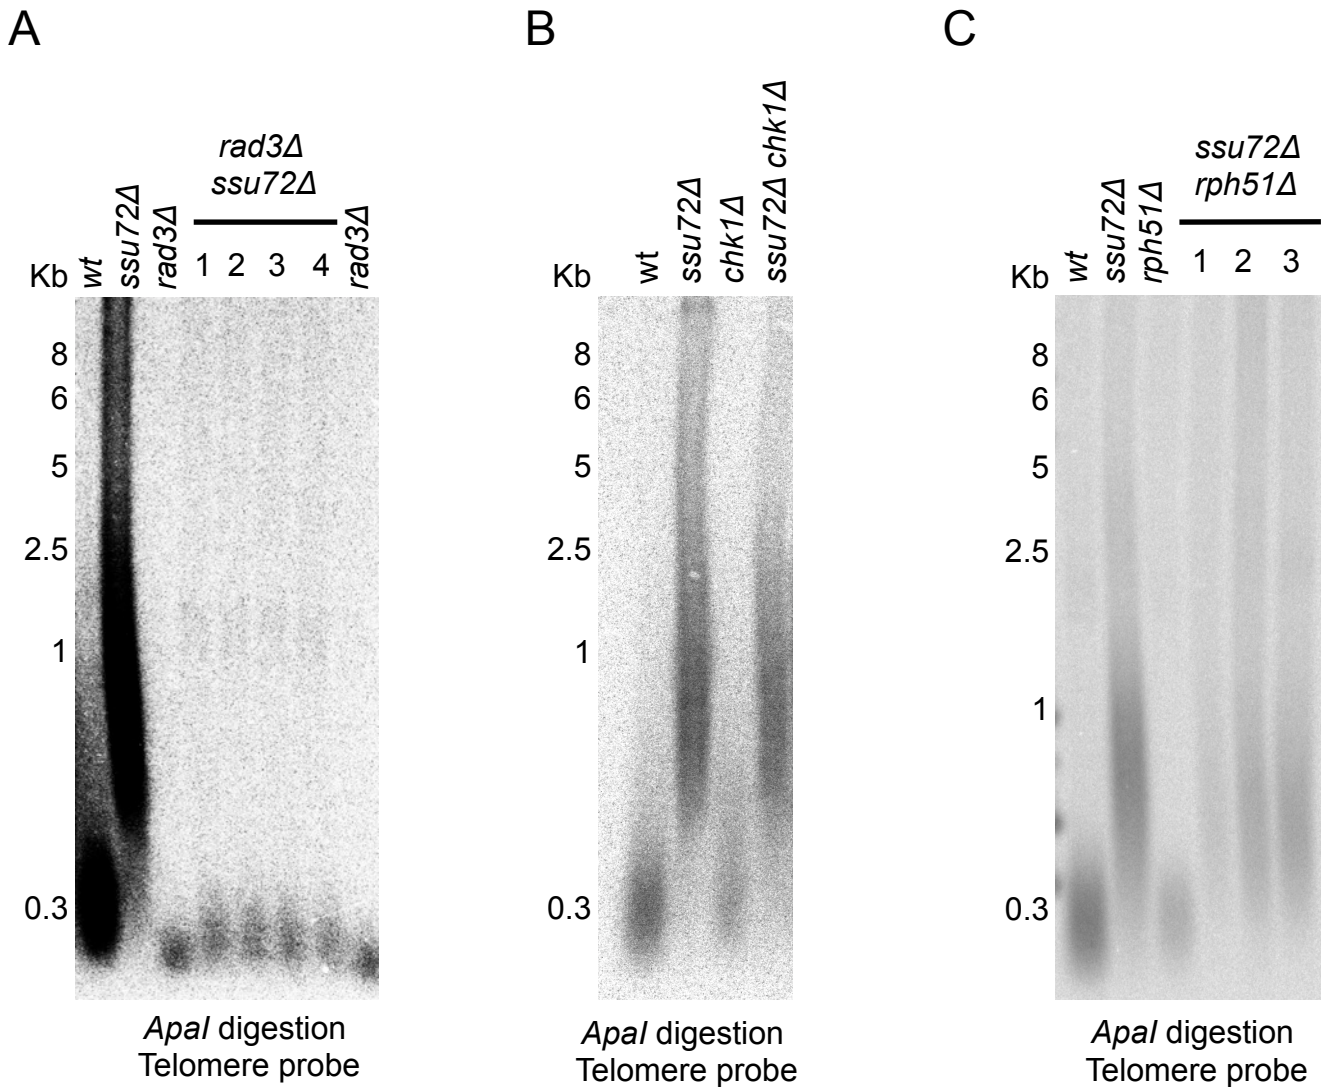

**Figure S2. Telomere length in *ssu72Δ* is *rad3Δ* (A) dependent, but checkpoint (B) and homologous recombination (C) independent.** *rad3Δ* (A) *chk1Δ* (B), *rph51Δ* (C) single mutants or different colonies of double mutants *ssu72Δ-rad3Δ* (A), *ssu72Δ-chk1Δ* (B), *ssu72Δ-rph51Δ* (C) were constructed and telomere length was measured carrying out Southern blots in *Apal* digested genomic DNA using a telomeric probe.

A

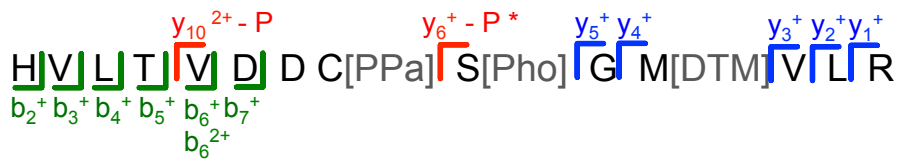

Spectrum from SP-C.wiff (sample 1) – SP-C. Experiment 23, +TOF MS<sup>2</sup>(150-1800) from 29,601 min  
 Precursor: 549.9 Da

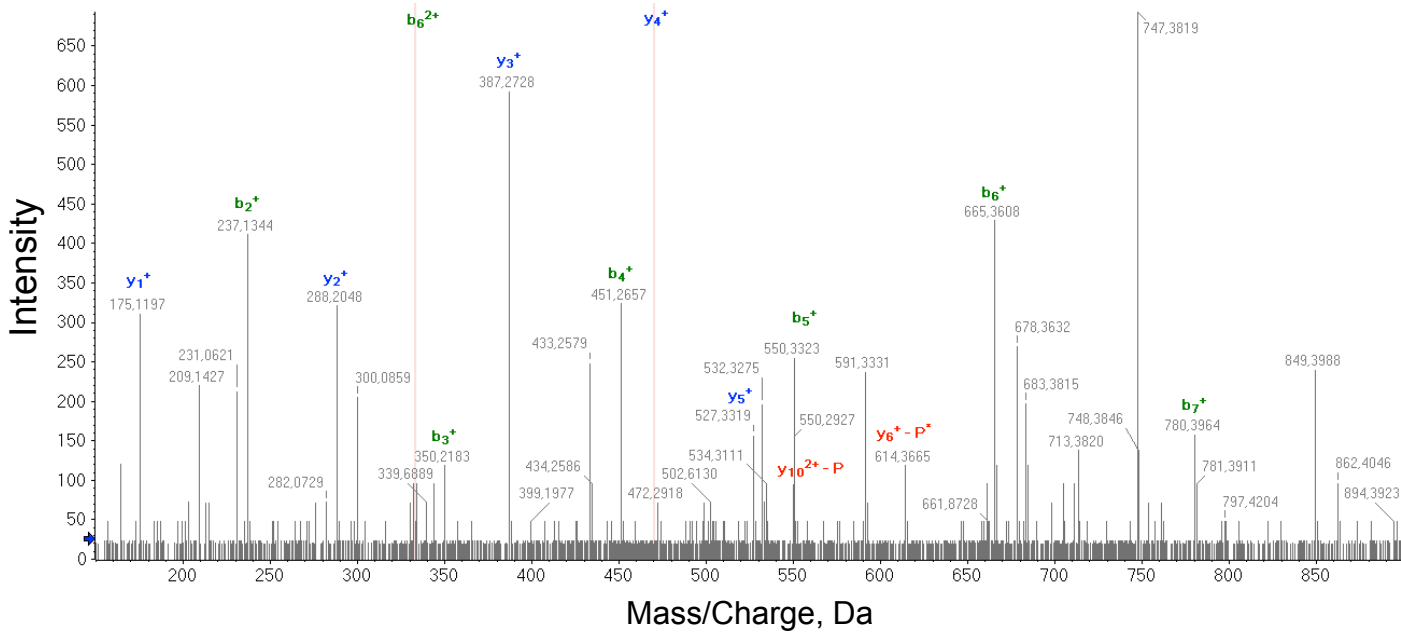

B

|                           |                          |                            |                                      |
|---------------------------|--------------------------|----------------------------|--------------------------------------|
| Stn1 <i>S. pombe</i>      | 1--MLENENQLTHQFPPTLSRWNP | FISDVHKISFHPHLQRYIGFWMGFP  | IRWIQIVGYIAAI                        |
| Stn1 <i>S. japonicus</i>  | 1--MNTSAVNALVKACPTLT     | KWIPIFISDLTYLVRKPGV--EEVLF | WYRLPVIWLRIVGIVMSV                   |
| Stn1 <i>S. octosporus</i> | 1--MLVEDEGINKHCTTLL      | TRWNP                      | FINDVYSIVFNGSTTQNI                   |
| Stn1 <i>S. cryofilus</i>  | 1--MPLEDEDINKQCTTLL      | TRWNP                      | FINDVYSIVFSDSISKEIGFWFGHP            |
|                           |                          |                            | ICWIQVVGIVVSL                        |
|                           | : : :                    | **::* *::**:::             | . : ** * : *::** : :                 |
| Stn1 <i>S. pombe</i>      | 72- DIYEGKHLVTVDDC       | SGMVLRVVFI                 | IQDDFSMSKRAISMSPGNVVCVFGKINSFRSEVELI |
| Stn1 <i>S. japonicus</i>  | 72- DEYEGRTNVTVDDA       | SGRTIVCCIDQ                | TNIPWTREDRSSWIGKAFRIDGRLQCIGLNRRL    |
| Stn1 <i>S. octosporus</i> | 72- DVYEDRCICVDDC        | TGQSLRTVFS                 | MQEKPSLAQKASTLNPGNIVRVGGKIQRSH-SVHLV |
| Stn1 <i>S. cryofilus</i>  | 72- DFYEDKYVCTVDDC       | TSONIRTVFSL                | KERRSLAQKAKRLNPGSIVRVGGKIQRVH-SFHLL  |
|                           | * ** :                   | .***::: :                  | : : : : : * . . : *::: . . . :       |

**Figure S3. A) Identification of S74 as Stn1 phosphorylation site in fission yeast.** Mass spectrometry spectra identifying the phosphorylated peptide on the Stn1-S74 residue  
**B) S74 residue is conserved in Schizosaccharomyces family.** Sequence alignment of Stn1 protein in *Schizosaccharomyces* family (*S. pombe*, *S. cryophilus*, *S. octosporus*, and *S. japonicus*) using Clustal Omega. Serine identified in fission yeast as phosphorylated is squared in red. The site is either conserved or substituted by other aminoacid that is capable to be phosphorylated in *Schizosaccharomyces* family.

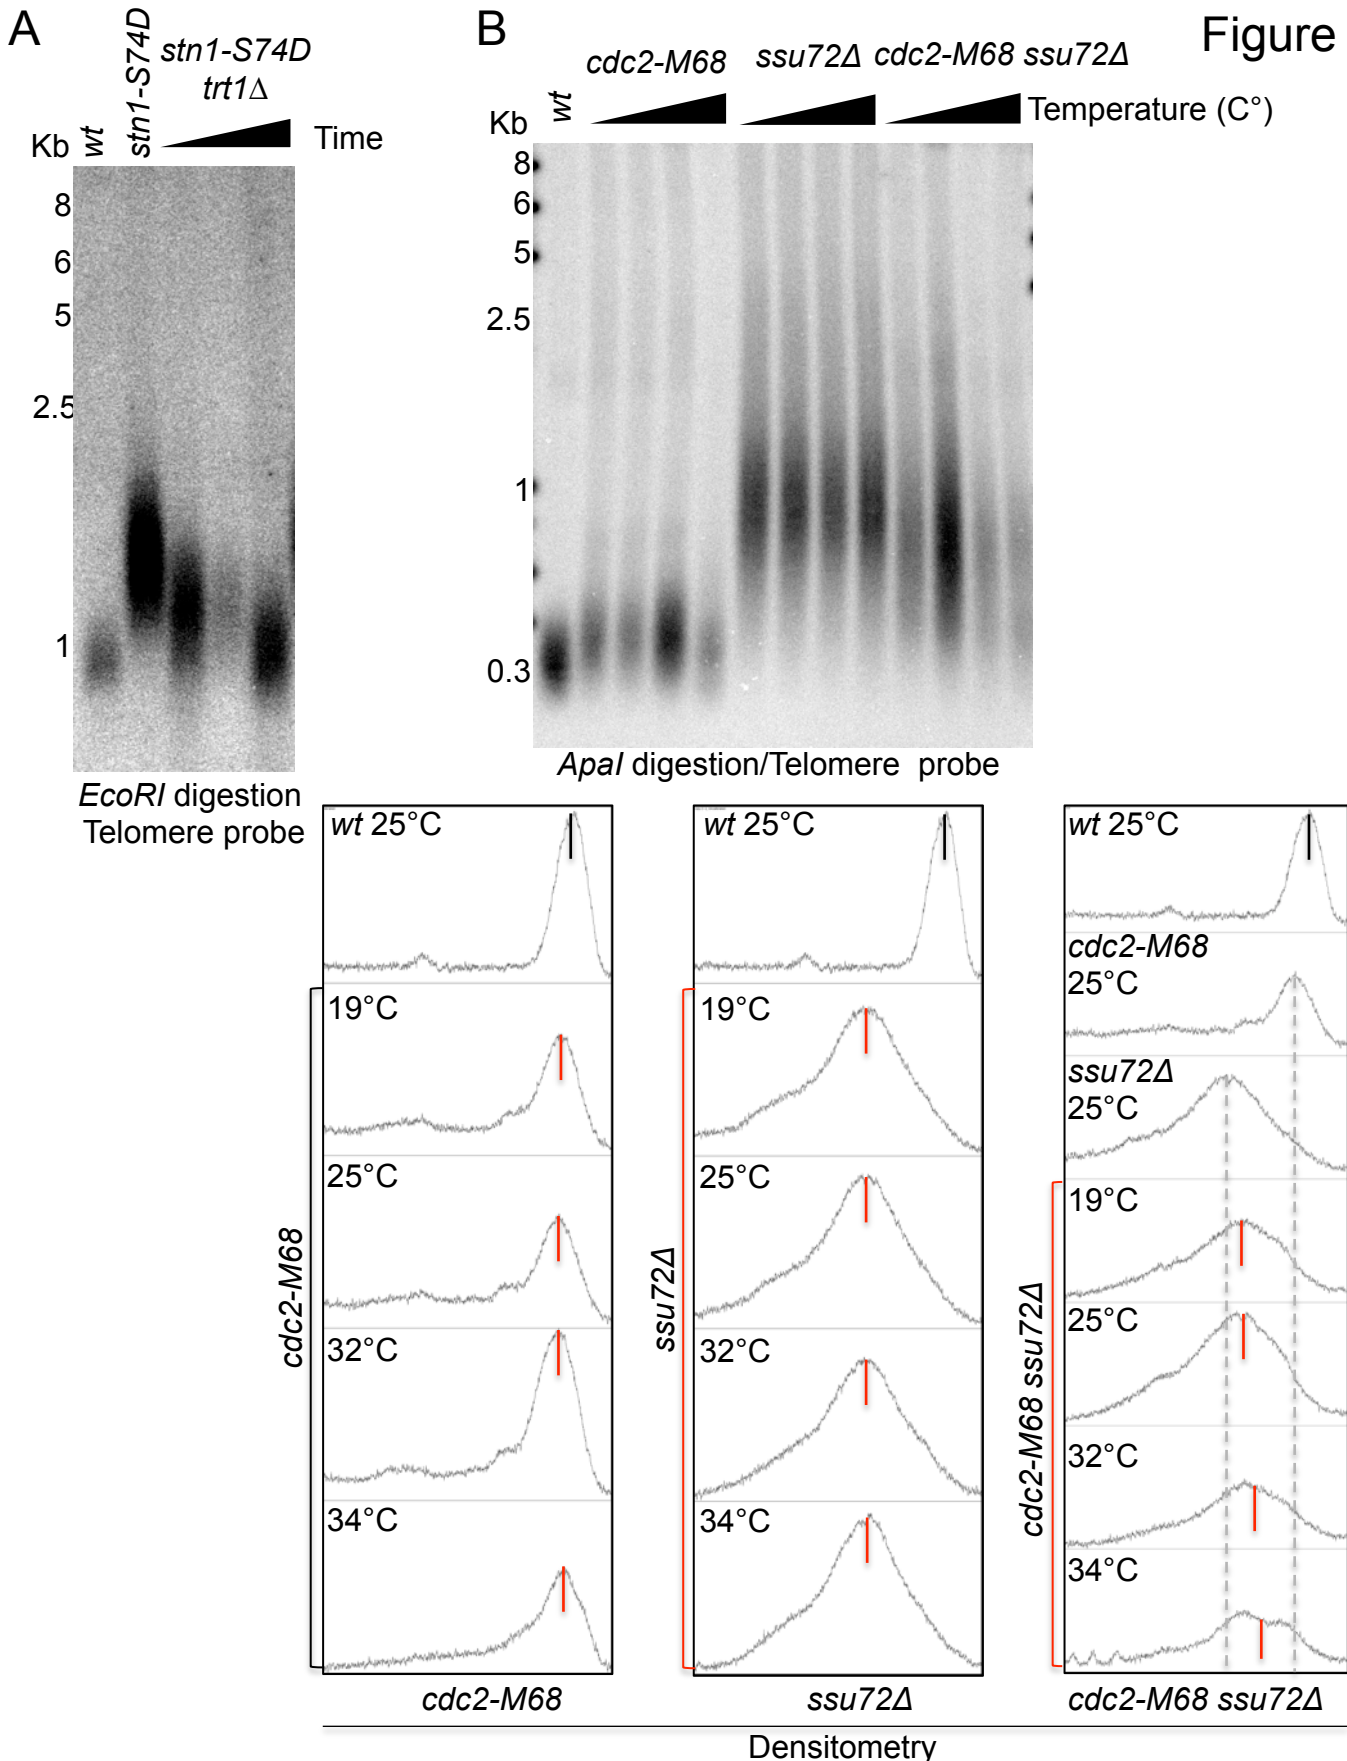

**Figure S4. A) Telomere length of *stn1-S74D* is dependent on telomerase.** *trt1<sup>+</sup>* was deleted in the *stn1-S74D* background and double mutants were streaked for multiple passages (triangle indicates increased number of generations). **B) Cdk1 activities are required to elongate telomeres in a *ssu72Δ* background.** Cells were grown at 25°C and then shifted to different temperatures by 16 hours to partially inactivate *cdc2*. DNA was isolated and telomere length measured with *Apal* digested DNA. Strains were constructed by regular techniques. B) Telomere length was measured with ImageJ. Black and Red lines represent average telomere length in wt, *cdc2-M68*, *ssu72Δ* or double mutant *cdc2-M68 ssu72Δ* strains.

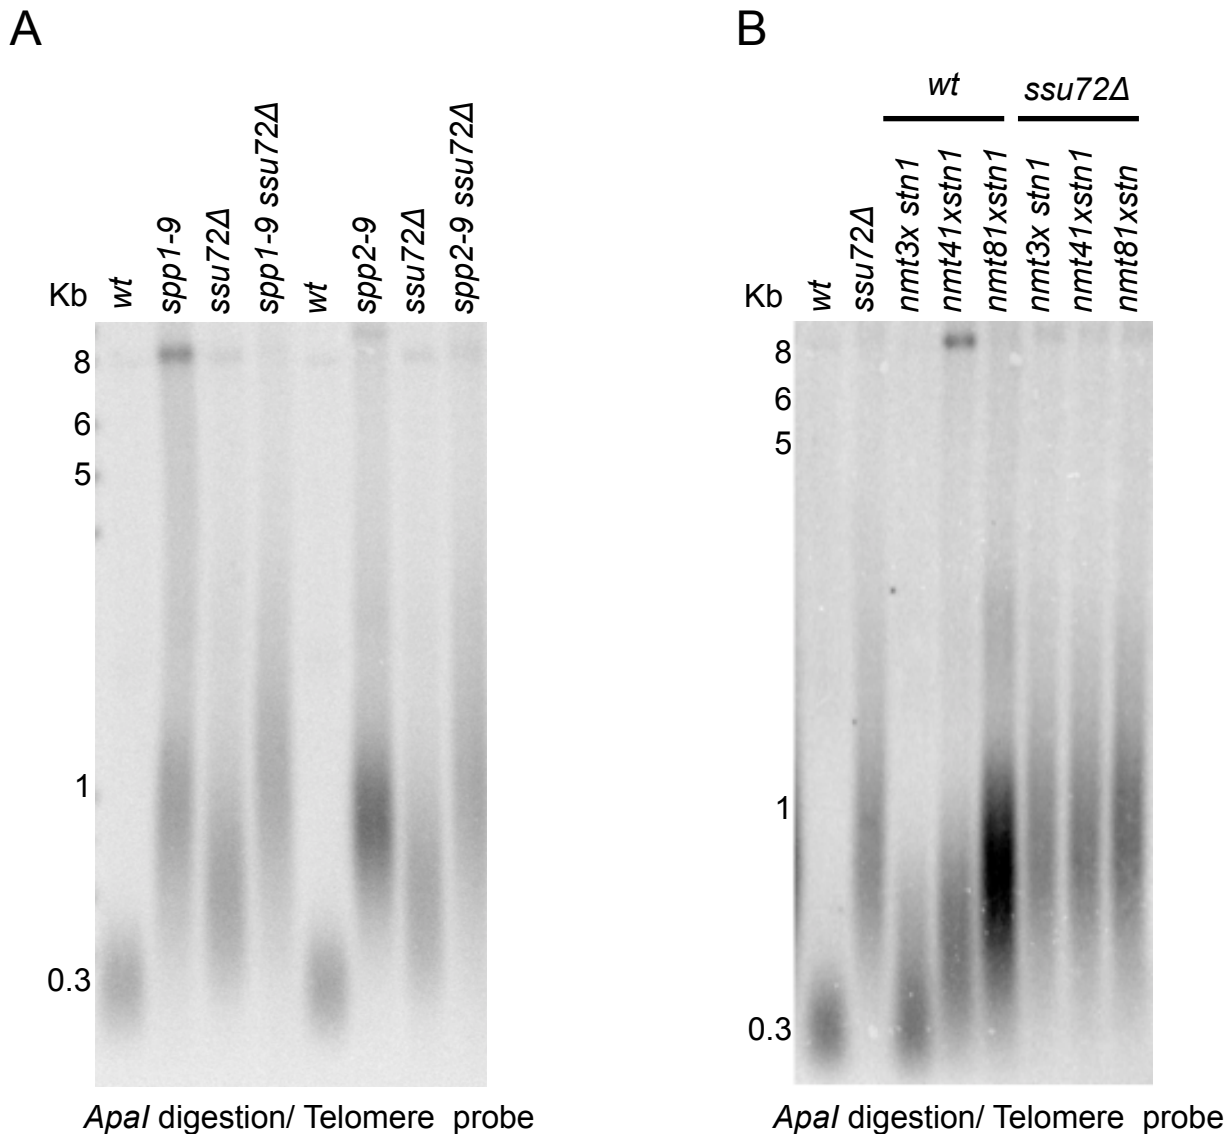

**Figure S5. A) *ssu72Δ* telomere length is epistatic with polymerase alpha complex subunits.** Genomic DNA of single mutants of *pol1-13*, *spp1-9*, *spp2-9*, *ssu72Δ* and *wt* or double mutants *spp1-9 ssu72Δ* and *spp2-9 ssu72Δ* was isolated and telomere length was measured carrying out a Southern blot in *Apal* digested genomic DNA using a telomeric probe. Temperature sensitive strains were grown at semi-permissive temperature by several generations and DNA was collected to carry out Southern Blot analysis. **B) *Stn1* overexpression doesn't rescue telomere defect in *ssu72Δ*.** We expressed *stn1* under 3x (stronger), 41x and 81x (weaker) *nmt1* promoter in *wt* or *ssu72Δ* background and telomere length was measured in *Apal* digested genomic DNA.

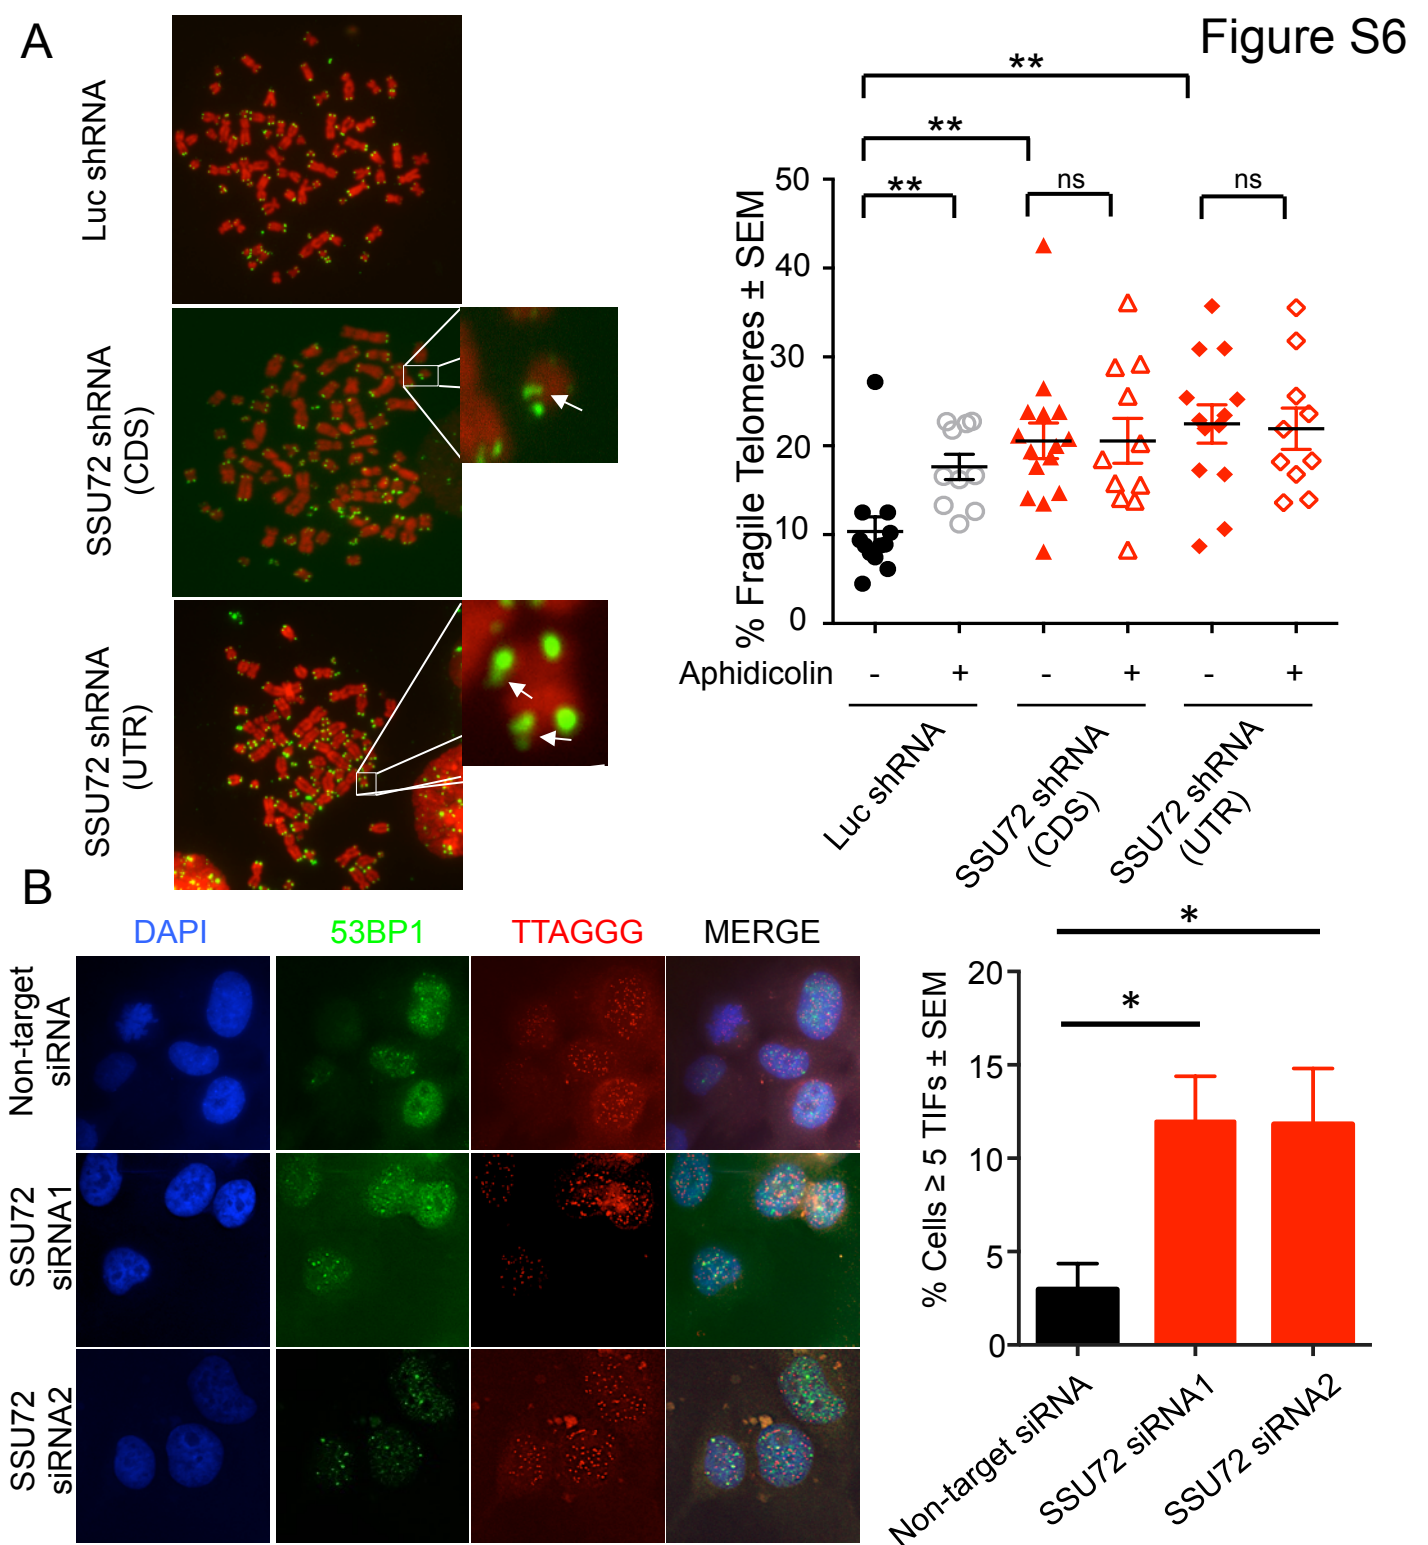

**Figure S6. A) SSU72 downregulation induces telomere fragility in U2OS cell line.** Cells were infected with lentiviral particles carrying shRNAs against either SSU72 or Luciferase shRNAs. If appropriate, cells were treated with Aphidicolin at 200 ng/ml for 12 hours before colcemid treatment. Metaphases were collected and FISH was carried out using a PNA- telomeric probe. Quantification of MTS in SSU72 downregulated cell was carried out  $n = 2$ ;  $**p \leq 0.01$  based on a two-tailed Student's t-test to control sample. Error bars represent mean  $\pm$  standard error of the mean.

**B) SSU72 downregulation induces 53BP1 foci at telomeres in Hela human cell line.** Cells were transfected with two independent siRNAs against human SSU72 using a non-targeting siRNA as a control. After 3 days cells were fixed and IF-FISH was carried out using a 53BP1 antibody and PNA- telomeric probe. Quantification of Telomeric induce foci (TIF) in SSU72 downregulated cell was carried out  $n = 3$ ;  $*p \leq 0.05$  based on a two-tailed Student's t-test to control sample. Error bars represent mean  $\pm$  standard error of the mean.



| Figures | Strains N° | Column1                                                             | Genotype                                                                                                  |                                 |
|---------|------------|---------------------------------------------------------------------|-----------------------------------------------------------------------------------------------------------|---------------------------------|
| 1A      |            | h+                                                                  | ade6-M210 ura4-D18 leu1-32 SPAC30D11.10::KanMX6                                                           | Bionner's library               |
|         |            | h+                                                                  | ade6-M210 ura4-D18 leu1-32 SPAC30F12.04::KanMX6                                                           | Bionner's library               |
|         |            | h+                                                                  | ade6-M210 ura4-D18 leu1-32 SPBC17D1.06::KanMX6                                                            | Bionner's library               |
|         |            | h+                                                                  | ade6-M210 ura4-D18 leu1-32 SPAC926.09c::KanMX6                                                            | Bionner's library               |
|         |            | h+                                                                  | ade6-M210 ura4-D18 leu1-32 SPAC3G9.04::KanMX6                                                             | Bionner's library               |
|         | MGF11      | h+                                                                  | ade6-M210 his3-D1 leu1-32 ura4-D18::KanMX6                                                                | This study                      |
|         | MGF2194    | h-                                                                  | ade6-M210 his3-D1 leu1-32 ura4-D18 ssu72::KanMX6                                                          | This study                      |
|         |            |                                                                     |                                                                                                           |                                 |
|         |            |                                                                     |                                                                                                           |                                 |
|         |            |                                                                     |                                                                                                           |                                 |
| 1B      | MGF11      | h+                                                                  | ade6-M210 his3-D1 leu1-32 ura4-D18                                                                        | This study                      |
|         | MGF2194    | h-                                                                  | ade6-M210 his3-D1 leu1-32 ura4-D18 ssu72::KanMX6                                                          | This study                      |
|         | MGF2547    | h-                                                                  | ade6-M210 his3-D1 leu1-32 ura4-D18 Ssu72 C13S                                                             | This study                      |
| 1C      | MGF762     | h+                                                                  | ade6-M7 leu1-32 his3-D1 ura4-D18 cdc25-22                                                                 | This study                      |
|         | MGF2735    | h-                                                                  | ura4-D18 (leu1-32 ura4-D18 ade6-M210 his3-D1)? cdc25-22 ssu72-Myc tag Nterminus colony1                   | This study                      |
| 1D      | MGF11      | h+                                                                  | ade6-M210 his3-D1 leu1-32 ura4-D18                                                                        | This study                      |
|         | MGF2699    | h/h+                                                                | ade6-M210/M216 his3-D1-/ leu1-32-/ ura4-D18/trt1:URA4 ssu72::NatMX6                                       | This study                      |
|         | MGF2700    | h?                                                                  | ade6-M210/M216 his3-D1-/ leu1-32-/ ura4-D18/trt1:URA4 ssu72::NatMX6 streak 1                              | This study                      |
|         | MGF2701    | h?                                                                  | ade6-M210/M216 his3-D1-/ leu1-32-/ ura4-D18/trt1:URA4 ssu72::NatMX6 streak 2                              | This study                      |
|         | MGF2702    | h?                                                                  | ade6-M210/M216 his3-D1-/ leu1-32-/ ura4-D18/trt1:URA4 ssu72::NatMX6 streak 3                              | This study                      |
|         | MGF2703    | h?                                                                  | ade6-M210/M216 his3-D1-/ leu1-32-/ ura4-D18/trt1:URA4 ssu72::NatMX6 streak 4                              | This study                      |
|         | MGF2194    | h-                                                                  | ade6-M210 his3-D1 leu1-32 ura4-D18 ssu72::KanMX6                                                          | This study                      |
| 1E      | MGF11      | h+                                                                  | ade6-M210 his3-D1 leu1-32 ura4-D18                                                                        | This study                      |
|         | MGF2435    | h-                                                                  | leu1-32 ura4-D18 his3-D1 trt1-G8-13myc::KanMX6                                                            | Toru Nakamura's laboratory      |
|         | MGF2441    | h?                                                                  | ade6-M210? leu1-32 ura4-D18 his3-D1 trt1-G8-13myc::KanMX6 ssu72::NatMX6                                   | This study                      |
| 1F      | MGF11      | h+                                                                  | ade6-M210 his3-D1 leu1-32 ura4-D18                                                                        | This study                      |
|         | MGF2397    | h-                                                                  | ade6-M210 his3-D1 leu1-32 ura4-D18 ccq1:ccq1-FLAG KanMX6 rap1:HphMX6                                      | This study                      |
|         | MGF2398    | h-                                                                  | ade6-M210 his3-D1 leu1-32 ura4-D18 ccq1:ccq1-FLAG KanMX6 ssu72::NatMX6                                    | This study                      |
|         | MGF2399    | h+                                                                  | ade6-M210 his3-D1 leu1-32 ura4-D18 ccq1:ccq1-FLAG KanMX6                                                  | This study                      |
| 2A      | MGF11      | h+                                                                  | ade6-M210 his3-D1 leu1-32 ura4-D18                                                                        | This study                      |
|         | MGF2194    | h-                                                                  | ade6-M210 his3-D1 leu1-32 ura4-D18 ssu72::KanMX6                                                          | This study                      |
|         | MGF36      | h-                                                                  | ade6-M216 rif1::KanMX6                                                                                    | July Cooper's laboratory        |
| 2B      | MGF2591    | h-                                                                  | ade6-M210 his3-D1 leu1-32 ura4-D18 ssu72::N terminus 13myc-ssu72                                          | This study                      |
|         | MGF2552    | h?                                                                  | ade6-M21? his3-D1? leu1-32? ura4-D18 SPAC3G9.04::NatMX6 rad11::rad11-GFP (KanMX6) taz1:taz1-mRFP (HphMX6) | This study                      |
| 2C      | MGF11      | h+                                                                  | ade6-M210 his3-D1 leu1-32 ura4-D18                                                                        | This study                      |
|         | MGF2194    | h-                                                                  | ade6-M210 his3-D1 leu1-32 ura4-D18 ssu72::KanMX6                                                          | This study                      |
|         | MGF2547    | h-                                                                  | ade6-M210 his3-D1 leu1-32 ura4-D18 Ssu72 C13S                                                             | This study                      |
|         | MGF2326    | h-                                                                  | ade6-M21? his3-D1 leu1-32 SPAC3G9.04::KanMX6 ura4-D18 rif1::HphMX6                                        | This study                      |
|         | MGF36      | h-                                                                  | ade6-M216 rif1::Kan                                                                                       | July Cooper's laboratory        |
|         | MGF2587    | h-                                                                  | ade6-M210 his3-D1 leu1-32 ura4-D18 Ssu72 C13S Rif1::HphMX6                                                | This study                      |
| 2D      | MGF11      | h+                                                                  | ade6-M210 his3-D1 leu1-32 ura4-D18                                                                        | This study                      |
|         | MGF2194    | h-                                                                  | ade6-M210 his3-D1 leu1-32 ura4-D18 ssu72::KanMX6                                                          | This study                      |
|         | MGF2707    | h-                                                                  | stn1-75                                                                                                   | Alessandro Bianchi's laboratory |
|         | MGF3035    | h?                                                                  | stn1-75 ade6-M21? his3-D1? leu1-32? ura4-D18? ssu72::NatMX6                                               | This study                      |
|         | MGF3036    | h?                                                                  | stn1-75 ade6-M21? his3-D1? leu1-32? ura4-D18? ssu72::NatMX6                                               | This study                      |
| 3A      | MGF2909    | h-                                                                  | ade6-M210? leu1-32 ura4-D18 his3-D1 stn1-13myc::KanMX6MX cdc25ts colony                                   | This study                      |
|         | MGF2912    | h?                                                                  | ade6-M210? leu1-32 ura4-D18 his3-D1 stn1-13myc::KanMX6MX cdc25ts ssu72::NatMX6                            | This study                      |
|         | MGF11      | h+                                                                  | ade6-M210 his3-D1 leu1-32 ura4-D18                                                                        | This study                      |
| 3B      | MGF11      | h+                                                                  | ade6-M210 his3-D1 leu1-32 ura4-D18                                                                        | This study                      |
|         | MGF2194    | h-                                                                  | ade6-M210 his3-D1 leu1-32 ura4-D18 ssu72::KanMX6                                                          | This study                      |
| 3C      | MGF11      | h+                                                                  | ade6-M210 his3-D1 leu1-32 ura4-D18                                                                        | This study                      |
|         | MGF2194    | h-                                                                  | ade6-M210 his3-D1 leu1-32 ura4-D18 ssu72::KanMX6                                                          | This study                      |
|         | MGF3004    | h-                                                                  | ade6-M210 his3-D1 leu1-32 ura4-D18 Sln1s74D                                                               | This study                      |
|         | MGF3005    | h-                                                                  | ade6-M210 his3-D1 leu1-32 ura4-D18 Sln1s74D ssu72::NatMX6                                                 | This study                      |
| 3E      | MGF11      | h+                                                                  | ade6-M210 his3-D1 leu1-32 ura4-D18                                                                        | This study                      |
|         | MGF2438    | h-                                                                  | leu1-32 ura4-D18 his3-D1 stn1-13myc::kanMX6                                                               | Toru Nakamura's laboratory      |
|         | MGF3020    | h-                                                                  | ade6-M210 his3-D1 leu1-32 ura4-D18 Sln1s74D-13myc::KanMX6MX ssu72::NatMX6                                 | This study                      |
| 4A      | MGF11      | h+                                                                  | ade6-M210 his3-D1 leu1-32 ura4-D18                                                                        | This study                      |
|         | MGF2194    | h-                                                                  | ade6-M210 his3-D1 leu1-32 ura4-D18 ssu72::KanMX6                                                          | This study                      |
|         | MGF2550    | h+                                                                  | ade6-M210 his3-D1 leu1-32 ura4-D18 pol11:pol1-13                                                          | Teresa Wang's laboratory        |
|         | MGF2564    | h?                                                                  | ade6-M210 his3-D1 leu1-32 ura4-D18 pol11:pol1-13 ssu72::NatMX6                                            | This study                      |
| 4B      | MGF2443    | h?                                                                  | ade6-M210? leu1-32 ura4-D18 his3-D1 ten1-5FLAG-TEV-Avi-KanMX6 ssu72::NatMX6                               | This study                      |
|         | MGF11      | h+                                                                  | ade6-M210 his3-D1 leu1-32 ura4-D18                                                                        | This study                      |
|         | MGF2438    | h-                                                                  | leu1-32 ura4-D18 his3-D1 stn1-13myc::kanMX6                                                               | Toru Nakamura's laboratory      |
|         | MGF2826    | h+                                                                  | ade6-M210? his3-D1 leu1-32 ura4-D18 pol1-Flag C-terminus (HphMX6) stn1-Myc ( KanMX6)                      | This study                      |
|         | MGF2829    | h?                                                                  | ade6-M210? his3-D1 leu1-32 ura4-D18 pol1-Flag C-terminus (HphMX6) stn1-Myc ( KanMX6) ssu72::NatMX6        | This study                      |
| MGF2755 | h?         | leu1-32 ura4-D18 his3-D1 ten1-5FLAG-TEV-Avi-KanMX6 ssu72::Myc-ssu72 | This study                                                                                                |                                 |
| 4C      | MGF2579    | h-                                                                  | ade6-M210 his3-D1 leu1-32 ura4-D18 rep nmt41-empty vector Leu2                                            | This study                      |
|         | MGF2580    | h-                                                                  | ade6-M210 his3-D1 leu1-32 ura4-D18 rep nmt41-pol1oe vector Leu2                                           | This study                      |
|         | MGF2581    | h-                                                                  | ade6-M210 his3-D1 leu1-32 ura4-D18 SPAC3G9.04::KanMX6 rep nmt41-empty vector Leu2                         | This study                      |
|         | MGF2582    | h-                                                                  | ade6-M210 his3-D1 leu1-32 ura4-D18 SPAC3G9.04::KanMX6 rep nmt41-pol1oe vector Leu2                        | This study                      |
| S1      | MGF11      | h+                                                                  | ade6-M210 his3-D1 leu1-32 ura4-D18                                                                        | This study                      |
|         | MGF2194    | h-                                                                  | ade6-M210 his3-D1 leu1-32 ura4-D18 ssu72::KanMX6                                                          | This study                      |
|         | MGF2723    | h/h+                                                                | leu1-32/leu1-32 ura4-D18/ura4-D18 ade6-M210/ade6-M216 his3-D1/his3-D1 ccq1-T93A::NatMX6/ccq1+             | This study                      |
|         | MGF2733    | h?                                                                  | leu1-32/leu1-32 ura4-D18/ura4-D18 ade6-M210/ade6-M216 his3-D1/his3-D1 ccq1-T93A::NatMX6                   | This study                      |
|         | MGF2734    | h?                                                                  | leu1-32/leu1-32 ura4-D18/ura4-D18 ade6-M210/ade6-M216 his3-D1/his3-D1 ccq1-T93A::NatMX6 ssu72::KanMX6     | This study                      |
| S2A     | MGF11      | h+                                                                  | ade6-M210 his3-D1 leu1-32 ura4-D18                                                                        | This study                      |
|         | MGF2194    | h-                                                                  | ade6-M210 his3-D1 leu1-32 ura4-D18 SPAC3G9.04                                                             | This study                      |
|         | MGF2303    | h?                                                                  | ade6-M ?? leu1-32 ura4-D18 his3-D1 rad3::NatMX6 ssu72::KanMX6                                             | This study                      |
|         | MGF727     | h+                                                                  | ade6-M ?? leu1-32 ura4-D18 his3-D1 rad3::NatMX6                                                           | This study                      |
| S2B     | MGF11      | h+                                                                  | ade6-M210 his3-D1 leu1-32 ura4-D18                                                                        | This study                      |
|         | MGF2194    | h-                                                                  | ade6-M210 his3-D1 leu1-32 ura4-D18 ssu72::KanMX6                                                          | This study                      |
|         | MGF2404    | h-                                                                  | ade6-M210 chk1::ura4 ade-6 leu1-32 ura4-D18 ssu72::NatMX6                                                 | This study                      |
|         | MGF26      | h-                                                                  | ade6-M210 chk1::ura4 ade-6 leu1-32 ura4-D18                                                               | This study                      |
| S2C     | MGF11      | h+                                                                  | ade6-M210 his3-D1 leu1-32 ura4-D18                                                                        | This study                      |
|         | MGF2194    | h-                                                                  | ade6-M210 his3-D1 leu1-32 ura4-D18 ssu72::KanMX6                                                          | This study                      |
|         | MGF2598    | h-                                                                  | rhp51::ura4+ leu1-32? ura4-D18? his3-D1? ssu72::NatMX6                                                    | This study                      |
|         | MGF168     | h+                                                                  | ade6-704 ura4-D18 leu1-32 rhp51::ura4+                                                                    | Tom Carr's laboratory           |
| S4A     | MGF11      | h+                                                                  | ade6-M210 his3-D1 leu1-32 ura4-D18                                                                        | This study                      |
|         | MGF3004    | h-                                                                  | ade6-M210 his3-D1 leu1-32 ura4-D18 Sln1s74D                                                               | This study                      |
|         | MGF3037    | h-                                                                  | ade6-M210 his3-D1 leu1-32 ura4-D18 Sln1s74D trt1::HphMX6                                                  | This study                      |
| S4B     | MGF11      | h+                                                                  | ade6-M210 his3-D1 leu1-32 ura4-D18                                                                        | This study                      |
|         | MGF2194    | h-                                                                  | ade6-M210 his3-D1 leu1-32 ura4-D18 ssu72::KanMX6                                                          | This study                      |
|         | MGF106     | h?                                                                  | ura4-D18 cdc2-M68                                                                                         | Paul Nurse's laboratory         |
|         | MGF2713    | h?                                                                  | ura4-D18 cdc2-M68 ssu72::NatMX6                                                                           | Paul Nurse's laboratory         |
| S5A     | MGF11      | h+                                                                  | ade6-M210 his3-D1 leu1-32 ura4-D18                                                                        | This study                      |
|         | MGF2194    | h-                                                                  | ade6-M210 his3-D1 leu1-32 ura4-D18 ssu72::KanMX6                                                          | This study                      |
|         | MGF2548    | h-                                                                  | ade6-M210 his3-D1 leu1-32 ura4-D18 spp2.9:URA4                                                            | Teresa Wang's laboratory        |
|         | MGF2549    | h+                                                                  | ade6-M210 his3-D1 leu1-32 ura4-D18 spp1.9                                                                 | Teresa Wang's laboratory        |
|         | MGF2555    | h?                                                                  | ade6-M210 his3-D1 leu1-32 ura4-D18 spp1.9 ssu72::NatMX6                                                   | This study                      |
|         | MGF2560    | h?                                                                  | ade6-M210 his3-D1 leu1-32 ura4-D18 spp2.spp2.9 URA4 ssu72::NatMX6                                         | This study                      |
| S5B     | MGF11      | h+                                                                  | ade6-M210 his3-D1 leu1-32 ura4-D18                                                                        | This study                      |
|         | MGF2194    | h-                                                                  | ade6-M210 his3-D1 leu1-32 ura4-D18 ssu72::KanMX6                                                          | This study                      |
|         | MGF2377    | h-                                                                  | ade6-M210 his3-D1 leu1-32 ura4-D18 stn1:stn1 Nterminus tag nmt1-3X KanMX6                                 | This study                      |
|         | MGF2378    | h-                                                                  | ade6-M210 his3-D1 leu1-32 ura4-D18 stn1:stn1 Nterminus tag nmt1-41X KanMX6                                | This study                      |
|         | MGF2379    | h-                                                                  | ade6-M210 his3-D1 leu1-32 ura4-D18 stn1:stn1 Nterminus tag nmt1-81X KanMX6                                | This study                      |
|         | MGF2380    | h+                                                                  | ade6-M210 his3-D1 leu1-32 ura4-D18 stn1:stn1 Nterminus tag nmt1-3X KanMX6 ssu72::NatMX6                   | This study                      |
|         | MGF2381    | h+                                                                  | ade6-M210 his3-D1 leu1-32 ura4-D18 stn1:stn1 Nterminus tag nmt1-41X KanMX6 ssu72::NatMX6                  | This study                      |
|         | MGF2382    | h+                                                                  | ade6-M210 his3-D1 leu1-32 ura4-D18 stn1:stn1 Nterminus tag nmt1-81X KanMX6 ssu72::NatMX6                  | This study                      |
